# Supplementary material
Source: PubMed Central journal article supplement (PMC6645317)
Supplement: ao8b01038_si_001.pdf [file ao8b01038_si_001.pdf]

Supporting Information for:

**The Discrete Existence of Singlet Nitrenium Ions Revisited:  
Computational Studies of Non-Aryl Nitrenium Ions and their  
Rearrangements.**

Daniel E. Falvey

Department of Chemistry and Biochemistry, University of Maryland, College Park, MD 20742  
(USA)

[Falvey@umd.edu](mailto:Falvey@umd.edu)

**Table S1.** Cartesian Coordinates for Structures 1-43.

**1S**

\*\*\*\*\*

%chk=NH2-s-CBSAPNO.chk

-----  
# cbs-apno scrf=(smd,solvent=water) geom=connectivity

| Center<br>Number | Atomic<br>Number | Atomic<br>Type | Coordinates (Angstroms) |           |           |
|------------------|------------------|----------------|-------------------------|-----------|-----------|
|                  |                  |                | X                       | Y         | Z         |
| 1                | 7                | 0              | 0.000000                | 0.000000  | 0.141272  |
| 2                | 1                | 0              | 0.000000                | 0.833941  | -0.494450 |
| 3                | 1                | 0              | 0.000000                | -0.833941 | -0.494450 |

**1T**

%chk=NH2-t-CBSAPNO.chk

-----  
# cbs-apno scrf=check geom=connectivity

| Center<br>Number | Atomic<br>Number | Atomic<br>Type | Coordinates (Angstroms) |           |           |
|------------------|------------------|----------------|-------------------------|-----------|-----------|
|                  |                  |                | X                       | Y         | Z         |
| 1                | 7                | 0              | 0.000000                | 0.000000  | 0.056790  |
| 2                | 1                | 0              | 0.000000                | 1.002306  | -0.198765 |
| 3                | 1                | 0              | 0.000000                | -1.002306 | -0.198765 |

**2S**

%chk=Methylnitrenium-s-SMDCBS.chk

-----  
# cbs-apno scrf=(smd,solvent=water) geom=connectivity

| Center<br>Number | Atomic<br>Number | Atomic<br>Type | Coordinates (Angstroms) |           |           |
|------------------|------------------|----------------|-------------------------|-----------|-----------|
|                  |                  |                | X                       | Y         | Z         |
| 1                | 7                | 0              | -0.756752               | -0.110540 | 0.000046  |
| 2                | 1                | 0              | -1.119494               | 0.847402  | 0.000299  |
| 3                | 6                | 0              | 0.505058                | -0.145573 | -0.000019 |

|   |   |   |          |           |           |
|---|---|---|----------|-----------|-----------|
| 4 | 1 | 0 | 1.181104 | -0.990266 | -0.000478 |
| 5 | 1 | 0 | 1.101237 | 0.895822  | -0.436939 |
| 6 | 1 | 0 | 1.104069 | 0.894267  | 0.436908  |

---

## 2T

%chk=Methylnitrenium-t-SMDCBS.chk

---

# cbs-apno scrf=(smd,solvent=water) geom=connectivity

---

| Center Number | Atomic Number | Atomic Type | Coordinates (Angstroms) |           |           |
|---------------|---------------|-------------|-------------------------|-----------|-----------|
|               |               |             | X                       | Y         | Z         |
| 1             | 7             | 0           | 0.744324                | 0.100734  | 0.000016  |
| 2             | 1             | 0           | 1.653582                | -0.383730 | -0.000036 |
| 3             | 6             | 0           | -0.649380               | -0.025082 | 0.000003  |
| 4             | 1             | 0           | -1.090473               | 0.977223  | -0.001156 |
| 5             | 1             | 0           | -0.938412               | -0.575020 | -0.906464 |
| 6             | 1             | 0           | -0.938687               | -0.573120 | 0.907523  |

---

## 2S-ts

%chk=MethylnitreniumTS-s-SMDdft.chk

---

# opt=qst3 freq=noraman 6-311g(d,p) geom=connectivity m062x

---

| Center Number | Atomic Number | Atomic Type | Coordinates (Angstroms) |           |           |
|---------------|---------------|-------------|-------------------------|-----------|-----------|
|               |               |             | X                       | Y         | Z         |
| 1             | 7             | 0           | 0.738407                | -0.154009 | -0.002689 |
| 2             | 1             | 0           | 1.212771                | 0.764157  | 0.036006  |
| 3             | 6             | 0           | -0.566621               | -0.056972 | 0.014932  |
| 4             | 1             | 0           | -1.181906               | -0.949759 | -0.021411 |
| 5             | 1             | 0           | -0.959283               | 0.819466  | 0.641500  |
| 6             | 1             | 0           | -0.840701               | 0.786028  | -0.726859 |

---

## 3S

\*\*\*\*\*

%chk=Dimethylnitrenium-s-dft.chk

-----

-----

| Center<br>Number | Atomic<br>Number | Atomic<br>Type | Coordinates (Angstroms) |           |           |
|------------------|------------------|----------------|-------------------------|-----------|-----------|
|                  |                  |                | X                       | Y         | Z         |
| 1                | 7                | 0              | 0.000000                | 0.000000  | 0.534266  |
| 2                | 6                | 0              | 0.000000                | 1.195069  | -0.172710 |
| 3                | 1                | 0              | -1.096422               | 1.394513  | 0.041537  |
| 4                | 1                | 0              | 0.502245                | 1.996986  | 0.379621  |
| 5                | 1                | 0              | 0.159085                | 1.149288  | -1.254824 |
| 6                | 6                | 0              | 0.000000                | -1.195069 | -0.172710 |
| 7                | 1                | 0              | 1.096422                | -1.394513 | 0.041537  |
| 8                | 1                | 0              | -0.502245               | -1.996986 | 0.379621  |
| 9                | 1                | 0              | -0.159085               | -1.149288 | -1.254824 |

### 3T

\*\*\*\*\*

%chk=DimethylnitreniumC2v-t-CBSAPNO.chk

-----

| Center<br>Number | Atomic<br>Number | Atomic<br>Type | Coordinates (Angstroms) |           |           |
|------------------|------------------|----------------|-------------------------|-----------|-----------|
|                  |                  |                | X                       | Y         | Z         |
| 1                | 7                | 0              | 0.000000                | 0.000000  | 0.306822  |
| 2                | 6                | 0              | 0.000000                | 1.367164  | -0.087966 |
| 3                | 1                | 0              | -0.906908               | 1.555250  | -0.681223 |
| 4                | 1                | 0              | 0.000000                | 1.987210  | 0.816368  |
| 5                | 1                | 0              | 0.906908                | 1.555250  | -0.681223 |
| 6                | 6                | 0              | 0.000000                | -1.367164 | -0.087966 |
| 7                | 1                | 0              | 0.906908                | -1.555250 | -0.681223 |
| 8                | 1                | 0              | 0.000000                | -1.987210 | 0.816368  |
| 9                | 1                | 0              | -0.906908               | -1.555250 | -0.681223 |

### 3S-ts

%chk=dimethylnitreniumTS-s-dft.chk

-----

# opt=(calcfc,tight,qst3) freq=noraman 6-311g(d,p) geom=connectivity m  
062x int=ultrafine

---



---

| Center<br>Number | Atomic<br>Number | Atomic<br>Type | Coordinates (Angstroms) |           |           |
|------------------|------------------|----------------|-------------------------|-----------|-----------|
|                  |                  |                | X                       | Y         | Z         |
| 1                | 7                | 0              | 0.024997                | -0.516253 | -0.032354 |
| 2                | 6                | 0              | 1.187721                | 0.178173  | -0.040747 |
| 3                | 1                | 0              | 2.049060                | -0.384307 | -0.407400 |
| 4                | 1                | 0              | 1.175710                | 1.266767  | -0.138217 |
| 5                | 6                | 0              | -1.187386               | 0.164868  | 0.023041  |
| 6                | 1                | 0              | -1.149719               | 1.248118  | 0.152222  |
| 7                | 1                | 0              | -1.543797               | -0.091764 | -1.009995 |
| 8                | 1                | 0              | -1.907688               | -0.375365 | 0.646608  |
| 9                | 1                | 0              | 1.199439                | -0.107927 | 1.089501  |

---

**4S-iso (did not converge on nitrogen ion)**

%chk=EthylNitrenium-s-dft .chk

---

# opt freq=noraman 6-311g(d,p) geom=connectivity rm062x

---

| Center<br>Number | Atomic<br>Number | Forces (Hartrees/Bohr) |              |              |
|------------------|------------------|------------------------|--------------|--------------|
|                  |                  | X                      | Y            | Z            |
| 1                | 7                | -0.004379586           | 0.000044844  | 0.005300497  |
| 2                | 1                | 0.002093246            | -0.000053660 | -0.001086154 |
| 3                | 6                | 0.005476303            | 0.000045807  | 0.001228395  |
| 4                | 1                | -0.002183877           | 0.002106748  | -0.003372450 |
| 5                | 1                | -0.000627052           | -0.002180632 | -0.003449528 |
| 6                | 6                | 0.000018756            | -0.000071058 | 0.001311407  |
| 7                | 1                | -0.000411697           | -0.000152804 | -0.000036607 |
| 8                | 1                | 0.000461589            | 0.000078584  | 0.000101655  |
| 9                | 1                | -0.000447682           | 0.000182172  | 0.000002785  |

---

4T

%chk=Ethylnitrenium-t-dft .chk

-----  
# opt=(calcf,tight) freq=noraman 6-311g(d,p) guess=save geom=connectivity um062x int=ultrafine

| Center Number | Atomic Number | Atomic Type | Coordinates (Angstroms) |           |           |
|---------------|---------------|-------------|-------------------------|-----------|-----------|
|               |               |             | X                       | Y         | Z         |
| 1             | 7             | 0           | 1.242497                | -0.253367 | 0.000025  |
| 2             | 1             | 0           | 1.580644                | -1.224134 | -0.000089 |
| 3             | 6             | 0           | 0.136466                | 0.576638  | -0.000010 |
| 4             | 1             | 0           | 0.207596                | 1.224587  | 0.890537  |
| 5             | 1             | 0           | 0.207617                | 1.224536  | -0.890595 |
| 6             | 6             | 0           | -1.174758               | -0.268340 | 0.000003  |
| 7             | 1             | 0           | -1.238343               | -0.880853 | 0.897113  |
| 8             | 1             | 0           | -1.986916               | 0.460559  | -0.000029 |
| 9             | 1             | 0           | -1.238325               | -0.880911 | -0.897068 |

### 5S-iso (did not converge on nitrenium)

%chk=isopropyl-s-dft.chk

-----  
# opt freq=noraman 6-311g(d,p) geom=connectivity rm062x

| Center Number | Atomic Number | Atomic Type | Coordinates (Angstroms) |           |           |
|---------------|---------------|-------------|-------------------------|-----------|-----------|
|               |               |             | X                       | Y         | Z         |
| 1             | 7             | 0           | 0.625393                | 0.639080  | 0.000055  |
| 2             | 1             | 0           | 1.103328                | 1.537095  | -0.000791 |
| 3             | 6             | 0           | -0.656401               | 0.655974  | 0.000335  |
| 4             | 6             | 0           | 1.483881                | -0.560950 | -0.000009 |
| 5             | 6             | 0           | -1.516627               | -0.538773 | 0.000101  |
| 6             | 1             | 0           | -1.119964               | 1.640515  | -0.000134 |
| 7             | 1             | 0           | 2.519452                | -0.233730 | 0.006564  |
| 8             | 1             | 0           | 1.281516                | -1.152118 | 0.892083  |
| 9             | 1             | 0           | 1.290535                | -1.145457 | -0.898581 |
| 10            | 1             | 0           | -2.169557               | -0.492530 | -0.878111 |
| 11            | 1             | 0           | -0.969037               | -1.477485 | 0.005421  |
| 12            | 1             | 0           | -2.179141               | -0.487354 | 0.870601  |

-----

**5T**

%chk=isopropyl-t-dft.chk

-----  
# opt=rcfc freq=noraman 6-311g(d,p) guess=read geom=connectivity um062

x  
-----

| Center<br>Number | Atomic<br>Number | Atomic<br>Type | Coordinates (Angstroms) |           |           |
|------------------|------------------|----------------|-------------------------|-----------|-----------|
|                  |                  |                | X                       | Y         | Z         |
| 1                | 7                | 0              | -0.018821               | 1.390287  | -0.016602 |
| 2                | 1                | 0              | -0.059670               | 2.015596  | -0.830776 |
| 3                | 6                | 0              | 0.001671                | 0.068098  | 0.387388  |
| 4                | 6                | 0              | 1.313156                | -0.603222 | -0.125093 |
| 5                | 6                | 0              | -1.294895               | -0.635576 | -0.122171 |
| 6                | 1                | 0              | 0.003177                | 0.078794  | 1.489703  |
| 7                | 1                | 0              | 2.194264                | -0.077850 | 0.238326  |
| 8                | 1                | 0              | 1.304082                | -1.616841 | 0.278539  |
| 9                | 1                | 0              | 1.313291                | -0.646779 | -1.213610 |
| 10               | 1                | 0              | -2.188323               | -0.138430 | 0.251152  |
| 11               | 1                | 0              | -1.301109               | -0.670474 | -1.211268 |
| 12               | 1                | 0              | -1.253561               | -1.651828 | 0.273403  |

**6S-iso (did converge on Nitrenium Ion)**

%chk=tertbutyl-s-dft.chk

-----  
# opt freq=noraman 6-311g(d,p) geom=connectivity m062x

-----

| Center<br>Number | Atomic<br>Number | Atomic<br>Type | Coordinates (Angstroms) |           |           |
|------------------|------------------|----------------|-------------------------|-----------|-----------|
|                  |                  |                | X                       | Y         | Z         |
| 1                | 7                | 0              | 0.621976                | -0.693109 | -0.003172 |
| 2                | 1                | 0              | 0.540859                | -1.706482 | 0.001422  |
| 3                | 6                | 0              | -0.473339               | -0.011972 | 0.004812  |
| 4                | 6                | 0              | 1.986000                | -0.145720 | 0.001250  |
| 5                | 6                | 0              | -1.781846               | -0.712920 | 0.000089  |
| 6                | 6                | 0              | -0.432976               | 1.476118  | 0.003754  |
| 7                | 1                | 0              | 2.265966                | 0.133276  | 1.018080  |
| 8                | 1                | 0              | 2.662081                | -0.913794 | -0.364875 |

|    |   |   |           |           |           |
|----|---|---|-----------|-----------|-----------|
| 9  | 1 | 0 | 2.035552  | 0.722119  | -0.653121 |
| 10 | 1 | 0 | -2.329863 | -0.437012 | 0.905942  |
| 11 | 1 | 0 | -2.372212 | -0.350322 | -0.846407 |
| 12 | 1 | 0 | -1.688282 | -1.796706 | -0.055200 |
| 13 | 1 | 0 | -0.130103 | 1.825002  | -0.990273 |
| 14 | 1 | 0 | -1.416917 | 1.885105  | 0.222025  |
| 15 | 1 | 0 | 0.292053  | 1.857543  | 0.725183  |

## 6T

%chk=tertbutyl-t-dft.chk

-----  
 # opt freq 6-311g(d,p) geom=connectivity um062x

| Center<br>Number | Atomic<br>Number | Atomic<br>Type | Coordinates (Angstroms) |           |           |
|------------------|------------------|----------------|-------------------------|-----------|-----------|
|                  |                  |                | X                       | Y         | Z         |
| 1                | 7                | 0              | 0.327000                | -0.000337 | 1.396984  |
| 2                | 1                | 0              | 1.110414                | -0.001140 | 2.061304  |
| 3                | 6                | 0              | -0.013737               | 0.000010  | 0.055014  |
| 4                | 6                | 0              | 0.611610                | 1.291721  | -0.566999 |
| 5                | 6                | 0              | 0.608535                | -1.293204 | -0.566918 |
| 6                | 6                | 0              | -1.557058               | 0.001833  | -0.088149 |
| 7                | 1                | 0              | 0.177541                | 2.185084  | -0.120660 |
| 8                | 1                | 0              | 1.695767                | 1.298273  | -0.457774 |
| 9                | 1                | 0              | 0.357921                | 1.256864  | -1.628772 |
| 10               | 1                | 0              | 0.172440                | -2.185495 | -0.120404 |
| 11               | 1                | 0              | 0.354809                | -1.257892 | -1.628666 |
| 12               | 1                | 0              | 1.692684                | -1.302260 | -0.457816 |
| 13               | 1                | 0              | -1.775973               | 0.002132  | -1.156336 |
| 14               | 1                | 0              | -1.986388               | -0.890204 | 0.366238  |
| 15               | 1                | 0              | -1.984313               | 0.894834  | 0.366299  |

## 7s-iso (did not converge on nitrenium)

%chk=DitBunitrenium-s-dft.chk

-----  
 # opt freq=noraman 6-311g(d,p) guess=read geom=connectivity m062x

-----  
 Center Atomic Atomic Coordinates (Angstroms)



| Number | Number | Type | X         | Y         | Z         |
|--------|--------|------|-----------|-----------|-----------|
| 1      | 7      | 0    | 0.266528  | 0.475561  | -0.009143 |
| 2      | 6      | 0    | 1.381537  | -0.182437 | 0.012491  |
| 3      | 6      | 0    | -1.142457 | -0.145958 | 0.010282  |
| 4      | 6      | 0    | -1.528196 | -0.481229 | -1.430235 |
| 5      | 1      | 0    | -0.859095 | -1.215323 | -1.880644 |
| 6      | 1      | 0    | -2.536930 | -0.898057 | -1.434807 |
| 7      | 1      | 0    | -1.534417 | 0.412993  | -2.057464 |
| 8      | 6      | 0    | -2.123823 | 0.886167  | 0.588901  |
| 9      | 1      | 0    | -3.101974 | 0.408147  | 0.633915  |
| 10     | 1      | 0    | -1.851350 | 1.173142  | 1.606862  |
| 11     | 1      | 0    | -2.238283 | 1.779146  | -0.022123 |
| 12     | 6      | 0    | 0.297709  | 1.949006  | -0.132176 |
| 13     | 1      | 0    | -0.427103 | 2.234825  | -0.890774 |
| 14     | 1      | 0    | 0.034961  | 2.418010  | 0.815118  |
| 15     | 1      | 0    | 1.273806  | 2.283902  | -0.460022 |
| 16     | 6      | 0    | 2.695795  | 0.523257  | 0.180540  |
| 17     | 1      | 0    | 3.425096  | -0.183183 | 0.574830  |
| 18     | 1      | 0    | 3.065047  | 0.858987  | -0.794847 |
| 19     | 1      | 0    | 2.635965  | 1.380238  | 0.848201  |
| 20     | 6      | 0    | 1.501102  | -1.663664 | -0.156141 |
| 21     | 1      | 0    | 1.555028  | -2.147964 | 0.823738  |
| 22     | 1      | 0    | 0.698921  | -2.107913 | -0.732599 |
| 23     | 1      | 0    | 2.449126  | -1.858703 | -0.659412 |
| 24     | 6      | 0    | -1.199953 | -1.364203 | 0.944774  |
| 25     | 1      | 0    | -0.843380 | -2.288015 | 0.500095  |
| 26     | 1      | 0    | -0.657426 | -1.174515 | 1.873841  |
| 27     | 1      | 0    | -2.243953 | -1.530271 | 1.209482  |

7T

%chk=DitBunitrenium-t-dft.chk

# opt freq=noraman 6-311g(d,p) geom=connectivity m062x

| Center<br>Number | Atomic<br>Number | Atomic<br>Type | Coordinates (Angstroms) |          |          |
|------------------|------------------|----------------|-------------------------|----------|----------|
|                  |                  |                | X                       | Y        | Z        |
| 1                | 7                | 0              | -0.000001               | 0.000157 | 0.405912 |

|    |   |   |           |           |           |
|----|---|---|-----------|-----------|-----------|
| 2  | 6 | 0 | 1.381839  | 0.000047  | 0.055235  |
| 3  | 6 | 0 | -1.381854 | -0.000063 | 0.055242  |
| 4  | 6 | 0 | -1.767427 | 1.436624  | -0.359969 |
| 5  | 1 | 0 | -1.238401 | 1.743881  | -1.261873 |
| 6  | 1 | 0 | -2.839473 | 1.437941  | -0.565030 |
| 7  | 1 | 0 | -1.567010 | 2.143847  | 0.445292  |
| 8  | 6 | 0 | -2.171216 | -0.445332 | 1.302603  |
| 9  | 1 | 0 | -3.229380 | -0.460254 | 1.037543  |
| 10 | 1 | 0 | -1.874209 | -1.445840 | 1.617625  |
| 11 | 1 | 0 | -2.025752 | 0.255153  | 2.125061  |
| 12 | 6 | 0 | 1.573505  | 1.002378  | -1.105615 |
| 13 | 1 | 0 | 1.003775  | 0.707667  | -1.987587 |
| 14 | 1 | 0 | 1.296610  | 2.012612  | -0.803439 |
| 15 | 1 | 0 | 2.635084  | 0.992626  | -1.360789 |
| 16 | 6 | 0 | 2.171491  | 0.442115  | 1.303565  |
| 17 | 1 | 0 | 2.025800  | -0.260200 | 2.124419  |
| 18 | 1 | 0 | 3.229635  | 0.457220  | 1.038444  |
| 19 | 1 | 0 | 1.874874  | 1.442009  | 1.620895  |
| 20 | 6 | 0 | 1.766597  | -1.435941 | -0.363100 |
| 21 | 1 | 0 | 2.838759  | -1.437465 | -0.567584 |
| 22 | 1 | 0 | 1.565363  | -2.144881 | 0.440453  |
| 23 | 1 | 0 | 1.237931  | -1.740830 | -1.266002 |
| 24 | 6 | 0 | -1.572946 | -0.999943 | -1.107787 |
| 25 | 1 | 0 | -1.003196 | -0.703196 | -1.989062 |
| 26 | 1 | 0 | -1.295839 | -2.010743 | -0.807723 |
| 27 | 1 | 0 | -2.634500 | -0.989962 | -1.363073 |

-----

**8s-iso (did not converge on nitrenium)**

%chk=azidinylnitrenium-s-dft.chk

-----

# opt freq 6-311g(d,p) nosymm geom=connectivity m062x

-----

-----

| Center<br>Number | Atomic<br>Number | Forces (Hartrees/Bohr) |             |              |
|------------------|------------------|------------------------|-------------|--------------|
|                  |                  | X                      | Y           | Z            |
| 1                | 6                | -0.002161674           | 0.001326153 | -0.002433167 |
| 2                | 6                | -0.006407238           | 0.005211826 | -0.004242984 |
| 3                | 1                | 0.000106789            | 0.000469271 | -0.000130697 |
| 4                | 1                | 0.001611065            | 0.000639353 | 0.000803419  |

|   |   |              |              |             |
|---|---|--------------|--------------|-------------|
| 5 | 1 | -0.000420079 | -0.001182895 | 0.000515997 |
| 6 | 1 | -0.003220871 | 0.000476859  | 0.000974039 |
| 7 | 7 | 0.010492009  | -0.006940567 | 0.004513393 |

-----  
 %chk=azidinylnitrenium-t-dft.chk  
 -----

# opt freq=noraman 6-311g(d,p) geom=connectivity m062x  
 -----

| Center<br>Number | Atomic<br>Number | Atomic<br>Type | Coordinates (Angstroms) |           |           |
|------------------|------------------|----------------|-------------------------|-----------|-----------|
|                  |                  |                | X                       | Y         | Z         |
| 1                | 6                | 0              | -0.861203               | 0.273481  | 0.000000  |
| 2                | 6                | 0              | 0.861208                | 0.273480  | 0.000000  |
| 3                | 1                | 0              | -1.313844               | 0.578104  | 0.944146  |
| 4                | 1                | 0              | -1.313844               | 0.578104  | -0.944146 |
| 5                | 1                | 0              | 1.313830                | 0.578114  | 0.944165  |
| 6                | 1                | 0              | 1.313830                | 0.578114  | -0.944165 |
| 7                | 7                | 0              | 0.000000                | -0.799172 | 0.000000  |

-----  
**9S-iso (did not converge on nitrenium)**

%chk=azetidinylnitrenium-s-dft.chk  
 -----

# opt=rcfc freq 6-311g(d,p) nosymm geom=connectivity rm062x  
 -----

| Center<br>Number | Atomic<br>Number | Atomic<br>Type | Coordinates (Angstroms) |           |           |
|------------------|------------------|----------------|-------------------------|-----------|-----------|
|                  |                  |                | X                       | Y         | Z         |
| 1                | 6                | 0              | -0.050824               | -1.171818 | -0.205712 |
| 2                | 6                | 0              | -0.922596               | 0.051711  | 0.205443  |
| 3                | 6                | 0              | 1.079251                | -0.193135 | -0.172339 |
| 4                | 1                | 0              | 0.028310                | -1.971482 | 0.531978  |
| 5                | 1                | 0              | -0.250691               | -1.594145 | -1.191365 |
| 6                | 1                | 0              | -1.354535               | 0.025497  | 1.203761  |
| 7                | 1                | 0              | -1.634463               | 0.410873  | -0.534969 |
| 8                | 1                | 0              | 0.598410                | 1.784878  | 0.345714  |
| 9                | 1                | 0              | 2.151024                | -0.208021 | -0.349001 |
| 10               | 7                | 0              | 0.356106                | 0.810549  | 0.167183  |

-----  
**9T**

%chk=azetidinylnitrenium-t-dft.chk  
-----

# opt freq=noraman 6-311g(d,p) geom=connectivity m062x  
-----

| Center<br>Number | Atomic<br>Number | Atomic<br>Type | Coordinates (Angstroms) |           |           |
|------------------|------------------|----------------|-------------------------|-----------|-----------|
|                  |                  |                | X                       | Y         | Z         |
| 1                | 6                | 0              | 0.000011                | -0.986205 | -0.000103 |
| 2                | 6                | 0              | -1.129050               | 0.107158  | -0.000164 |
| 3                | 6                | 0              | 1.129047                | 0.107167  | 0.000173  |
| 4                | 1                | 0              | -0.000128               | -1.566728 | 0.919674  |
| 5                | 1                | 0              | 0.000145                | -1.566538 | -0.920002 |
| 6                | 1                | 0              | -1.740603               | 0.198696  | 0.901730  |
| 7                | 1                | 0              | -1.740326               | 0.198904  | -0.902223 |
| 8                | 1                | 0              | 1.740319                | 0.198722  | 0.902257  |
| 9                | 1                | 0              | 1.740604                | 0.198931  | -0.901693 |
| 10               | 7                | 0              | -0.000008               | 0.995614  | 0.000117  |

**10S-iso (does not converge on nitrenium)**

%chk=pyrrolidinylnitrenium-s-dft.chk  
-----

# opt freq 6-311g(d,p) geom=connectivity m062x  
-----

| Center<br>Number | Atomic<br>Number | Atomic<br>Type | Coordinates (Angstroms) |           |           |
|------------------|------------------|----------------|-------------------------|-----------|-----------|
|                  |                  |                | X                       | Y         | Z         |
| 1                | 6                | 0              | 0.798352                | -0.969190 | -0.102405 |
| 2                | 6                | 0              | 0.041725                | 1.222143  | 0.042310  |
| 3                | 6                | 0              | -1.204703               | 0.427762  | -0.094751 |
| 4                | 6                | 0              | -0.721199               | -1.022377 | 0.129001  |
| 5                | 1                | 0              | 1.102874                | -1.263908 | -1.108425 |
| 6                | 1                | 0              | 1.383244                | -1.526091 | 0.627521  |
| 7                | 1                | 0              | 2.029920                | 0.851981  | 0.095417  |
| 8                | 1                | 0              | 0.123808                | 2.303053  | 0.107410  |
| 9                | 1                | 0              | -1.971250               | 0.764019  | 0.605300  |
| 10               | 1                | 0              | -1.600328               | 0.605220  | -1.103085 |
| 11               | 1                | 0              | -0.932160               | -1.328777 | 1.152949  |
| 12               | 1                | 0              | -1.204021               | -1.726663 | -0.543814 |

13 7 0 1.083266 0.481592 0.045971

---

### 10-T

%chk=pyrollidinylnitrenium-t-dft.chk

---

# opt freq 6-311g(d,p) geom=connectivity m062x

---

| Center Number | Atomic Number | Atomic Type | Coordinates (Angstroms) |           |           |
|---------------|---------------|-------------|-------------------------|-----------|-----------|
|               |               |             | X                       | Y         | Z         |
| 1             | 6             | 0           | -1.243386               | -0.485452 | -0.122598 |
| 2             | 6             | 0           | 1.243571                | -0.485143 | 0.122527  |
| 3             | 6             | 0           | 0.740668                | 0.950682  | -0.221175 |
| 4             | 6             | 0           | -0.741039               | 0.950418  | 0.221198  |
| 5             | 1             | 0           | -1.594097               | -0.588084 | -1.159399 |
| 6             | 1             | 0           | -1.988897               | -0.910695 | 0.554081  |
| 7             | 1             | 0           | 1.594565                | -0.587603 | 1.159267  |
| 8             | 1             | 0           | 1.989093                | -0.910070 | -0.554329 |
| 9             | 1             | 0           | 1.339017                | 1.698222  | 0.296187  |
| 10            | 1             | 0           | 0.827170                | 1.098169  | -1.297998 |
| 11            | 1             | 0           | -0.827548               | 1.097948  | 1.298011  |
| 12            | 1             | 0           | -1.339616               | 1.697823  | -0.296123 |
| 13            | 7             | 0           | 0.000204                | -1.168392 | 0.000084  |

---

### 11-iso (did not converge on nitrenium)

%chk=TMPnitrenium-s-dft.chk

---

# opt freq=noraman 6-311g(d,p) geom=connectivity m062x

---

| Center Number | Atomic Number | Atomic Type | Coordinates (Angstroms) |           |           |
|---------------|---------------|-------------|-------------------------|-----------|-----------|
|               |               |             | X                       | Y         | Z         |
| 1             | 6             | 0           | 1.251243                | -0.263783 | -0.150925 |
| 2             | 6             | 0           | -1.251512               | -0.263930 | -0.150857 |

|    |   |   |           |           |           |
|----|---|---|-----------|-----------|-----------|
| 3  | 6 | 0 | -1.251242 | 1.241274  | -0.326651 |
| 4  | 6 | 0 | -0.000286 | 1.862847  | 0.260173  |
| 5  | 6 | 0 | 1.251617  | 1.241232  | -0.324443 |
| 6  | 1 | 0 | -1.313794 | 1.489063  | -1.418912 |
| 7  | 1 | 0 | -2.156146 | 1.677805  | 0.170371  |
| 8  | 1 | 0 | -0.000151 | 2.965869  | 0.060454  |
| 9  | 1 | 0 | -0.001310 | 1.721915  | 1.373100  |
| 10 | 1 | 0 | 1.317010  | 1.490621  | -1.416173 |
| 11 | 1 | 0 | 2.155651  | 1.676574  | 0.175353  |
| 12 | 7 | 0 | -0.000069 | -0.885287 | -0.737010 |
| 13 | 6 | 0 | -2.494479 | -0.863302 | -0.834512 |
| 14 | 1 | 0 | -2.506682 | -1.922976 | -0.686719 |
| 15 | 1 | 0 | -3.377401 | -0.433690 | -0.409327 |
| 16 | 1 | 0 | -2.462974 | -0.649686 | -1.882499 |
| 17 | 6 | 0 | 2.494034  | -0.862404 | -0.835559 |
| 18 | 1 | 0 | 3.377123  | -0.434957 | -0.408542 |
| 19 | 1 | 0 | 2.505059  | -1.922522 | -0.690893 |
| 20 | 1 | 0 | 2.463418  | -0.645657 | -1.882929 |
| 21 | 6 | 0 | 1.338696  | -0.606095 | 1.348000  |
| 22 | 1 | 0 | 1.256936  | -1.665094 | 1.477365  |
| 23 | 1 | 0 | 2.277714  | -0.270795 | 1.736227  |
| 24 | 1 | 0 | 0.542202  | -0.120235 | 1.871868  |
| 25 | 6 | 0 | -1.338259 | -0.604203 | 1.348573  |
| 26 | 1 | 0 | -2.365546 | -0.674475 | 1.639510  |
| 27 | 1 | 0 | -0.851170 | -1.539305 | 1.530863  |
| 28 | 1 | 0 | -0.858334 | 0.164747  | 1.917157  |

-----  
 Rotational constants (GHZ): 1.9577184 1.1327178 1.0171450

## 11T

%chk=TMPnitrenium-t-dft.chk  
 -----

# opt freq 6-311g(d,p) geom=connectivity um062x  
 -----

| Center<br>Number | Atomic<br>Number | Atomic<br>Type | Coordinates (Angstroms) |           |           |
|------------------|------------------|----------------|-------------------------|-----------|-----------|
|                  |                  |                | X                       | Y         | Z         |
| 1                | 6                | 0              | 1.251243                | -0.263783 | -0.150925 |
| 2                | 6                | 0              | -1.251512               | -0.263930 | -0.150857 |
| 3                | 6                | 0              | -1.251242               | 1.241274  | -0.326651 |
| 4                | 6                | 0              | -0.000286               | 1.862847  | 0.260173  |

|    |   |   |           |           |           |
|----|---|---|-----------|-----------|-----------|
| 5  | 6 | 0 | 1.251617  | 1.241232  | -0.324443 |
| 6  | 1 | 0 | -1.313794 | 1.489063  | -1.418912 |
| 7  | 1 | 0 | -2.156146 | 1.677805  | 0.170371  |
| 8  | 1 | 0 | -0.000151 | 2.965869  | 0.060455  |
| 9  | 1 | 0 | -0.001310 | 1.721915  | 1.373100  |
| 10 | 1 | 0 | 1.317010  | 1.490621  | -1.416173 |
| 11 | 1 | 0 | 2.155651  | 1.676574  | 0.175354  |
| 12 | 7 | 0 | -0.000069 | -0.885287 | -0.737010 |
| 13 | 6 | 0 | -2.494479 | -0.863302 | -0.834512 |
| 14 | 1 | 0 | -2.506681 | -1.922976 | -0.686719 |
| 15 | 1 | 0 | -3.377401 | -0.433691 | -0.409328 |
| 16 | 1 | 0 | -2.462974 | -0.649686 | -1.882499 |
| 17 | 6 | 0 | 2.494034  | -0.862404 | -0.835559 |
| 18 | 1 | 0 | 3.377123  | -0.434957 | -0.408542 |
| 19 | 1 | 0 | 2.505059  | -1.922522 | -0.690893 |
| 20 | 1 | 0 | 2.463418  | -0.645657 | -1.882929 |
| 21 | 6 | 0 | 1.338696  | -0.606095 | 1.348000  |
| 22 | 1 | 0 | 1.256936  | -1.665094 | 1.477365  |
| 23 | 1 | 0 | 2.277714  | -0.270796 | 1.736228  |
| 24 | 1 | 0 | 0.542202  | -0.120235 | 1.871868  |
| 25 | 6 | 0 | -1.338259 | -0.604204 | 1.348573  |
| 26 | 1 | 0 | -2.365546 | -0.674476 | 1.639511  |
| 27 | 1 | 0 | -0.851170 | -1.539306 | 1.530862  |
| 28 | 1 | 0 | -0.858334 | 0.164746  | 1.917157  |

-----

**12S-iso (did not converge on nitrenium)**

chk=bicyclohex-s-DFT.chk

-----

# opt freq=noraman 6-311g(d,p) geom=connectivity m062x

-----

| Center<br>Number | Atomic<br>Number | Atomic<br>Type | Coordinates (Angstroms) |           |           |
|------------------|------------------|----------------|-------------------------|-----------|-----------|
|                  |                  |                | X                       | Y         | Z         |
| 1                | 6                | 0              | 1.581624                | 0.127937  | -0.020517 |
| 2                | 6                | 0              | 0.534508                | 1.199139  | 0.036352  |
| 3                | 6                | 0              | -0.618057               | -0.729703 | -0.390124 |
| 4                | 6                | 0              | 0.709991                | -1.141902 | 0.236592  |
| 5                | 1                | 0              | 2.053246                | 0.115383  | -1.011368 |
| 6                | 1                | 0              | 2.371353                | 0.303512  | 0.711244  |
| 7                | 1                | 0              | 1.122953                | -2.035100 | -0.225869 |

-----

|    |   |   |           |           |           |
|----|---|---|-----------|-----------|-----------|
| 8  | 1 | 0 | 0.606823  | -1.325024 | 1.308222  |
| 9  | 6 | 0 | -1.738674 | -0.025346 | 0.315093  |
| 10 | 1 | 0 | -2.685757 | 0.080845  | -0.199401 |
| 11 | 1 | 0 | -1.756892 | 0.044351  | 1.396834  |
| 12 | 1 | 0 | 0.656263  | 2.230374  | 0.359686  |
| 13 | 1 | 0 | -0.864348 | -1.091869 | -1.384559 |
| 14 | 7 | 0 | -0.617141 | 0.728111  | -0.288452 |

-----  
**12T**

%chk=bicyclohex-t-DFT.chk

-----  
# opt=calcfreq=noraman 6-311g(d,p) geom=connectivity m062x  
-----

-----  

| Center<br>Number | Atomic<br>Number | Atomic<br>Type | Coordinates (Angstroms) |           |           |
|------------------|------------------|----------------|-------------------------|-----------|-----------|
|                  |                  |                | X                       | Y         | Z         |
| 1                | 6                | 0              | 1.122669                | 0.785723  | 0.118265  |
| 2                | 6                | 0              | -0.382706               | 1.061802  | -0.106841 |
| 3                | 6                | 0              | -0.382689               | -1.061785 | -0.107059 |
| 4                | 6                | 0              | 1.122644                | -0.785735 | 0.118372  |
| 5                | 1                | 0              | 1.731577                | 1.205994  | -0.679592 |
| 6                | 1                | 0              | 1.430860                | 1.228421  | 1.066385  |
| 7                | 1                | 0              | 1.731777                | -1.206161 | -0.679222 |
| 8                | 1                | 0              | 1.430522                | -1.228257 | 1.066677  |
| 9                | 6                | 0              | -1.079132               | -0.000099 | 0.802584  |
| 10               | 1                | 0              | -2.162757               | -0.000085 | 0.748398  |
| 11               | 1                | 0              | -0.670444               | -0.000200 | 1.820480  |
| 12               | 1                | 0              | -0.766194               | 2.060976  | -0.281391 |
| 13               | 1                | 0              | -0.765987               | -2.060940 | -0.282105 |
| 14               | 7                | 0              | -0.623439               | 0.000117  | -1.104508 |

-----

**13S-iso (did not converge on nitrenium)**

\*\*\*\*\*

%chk=bicyclohept-s-dft.chk

-----  
# opt freq=noraman 6-311g(d,p) geom=connectivity rm062x  
-----  
-----



| Center<br>Number | Atomic<br>Number | Atomic<br>Type | Coordinates (Angstroms) |           |           |
|------------------|------------------|----------------|-------------------------|-----------|-----------|
|                  |                  |                | X                       | Y         | Z         |
| 1                | 6                | 0              | -1.448521               | -0.483098 | 0.265216  |
| 2                | 6                | 0              | 0.698344                | -1.115845 | 0.395639  |
| 3                | 6                | 0              | 0.418241                | 1.081227  | -0.100764 |
| 4                | 6                | 0              | -0.947184               | 0.950728  | 0.636311  |
| 5                | 1                | 0              | -2.284225               | -0.508661 | -0.429170 |
| 6                | 1                | 0              | -1.654269               | -1.134497 | 1.112769  |
| 7                | 1                | 0              | -1.641451               | 1.699505  | 0.256014  |
| 8                | 1                | 0              | -0.855642               | 1.086379  | 1.714277  |
| 9                | 6                | 0              | 1.486496                | 0.129847  | 0.558740  |
| 10               | 1                | 0              | 2.420078                | 0.163263  | -0.016679 |
| 11               | 1                | 0              | 1.734563                | 0.281247  | 1.611577  |
| 12               | 6                | 0              | 0.148076                | 0.219016  | -1.329716 |
| 13               | 1                | 0              | 1.015131                | 0.006056  | -1.953740 |
| 14               | 1                | 0              | -0.695257               | 0.524179  | -1.946556 |
| 15               | 1                | 0              | 0.614902                | -1.918582 | 1.126599  |
| 16               | 1                | 0              | 0.762736                | 2.100710  | -0.251340 |
| 17               | 7                | 0              | -0.221326               | -0.998693 | -0.539474 |

### 13T

%chk=bicyclohept-t-dft.chk

# opt freq=noraman 6-311g(d,p) geom=connectivity m062x

| Center<br>Number | Atomic<br>Number | Atomic<br>Type | Coordinates (Angstroms) |           |           |
|------------------|------------------|----------------|-------------------------|-----------|-----------|
|                  |                  |                | X                       | Y         | Z         |
| 1                | 6                | 0              | -1.427767               | -0.262060 | -0.528849 |
| 2                | 6                | 0              | -0.308426               | -1.182506 | 0.055115  |
| 3                | 6                | 0              | 0.407231                | 0.921564  | 0.533355  |
| 4                | 6                | 0              | -0.932455               | 1.163283  | -0.175028 |
| 5                | 1                | 0              | -1.579182               | -0.428341 | -1.594130 |
| 6                | 1                | 0              | -2.349154               | -0.532382 | -0.008751 |
| 7                | 1                | 0              | -0.837023               | 1.810154  | -1.046457 |
| 8                | 1                | 0              | -1.617912               | 1.646838  | 0.523856  |
| 9                | 6                | 0              | 0.145301                | -0.379784 | 1.319601  |
| 10               | 1                | 0              | 1.024079                | -0.810827 | 1.797982  |
| 11               | 1                | 0              | -0.676055               | -0.301564 | 2.032963  |

|    |   |   |           |           |           |
|----|---|---|-----------|-----------|-----------|
| 12 | 6 | 0 | 1.432963  | 0.401795  | -0.562226 |
| 13 | 1 | 0 | 2.448304  | 0.307819  | -0.155818 |
| 14 | 1 | 0 | 1.450257  | 0.965646  | -1.499059 |
| 15 | 1 | 0 | -0.523839 | -2.245404 | 0.128890  |
| 16 | 1 | 0 | 0.827555  | 1.763589  | 1.079822  |
| 17 | 7 | 0 | 0.847412  | -0.878469 | -0.730158 |

**14iso (did not converge on nitrenium)**

%chk=gassman-s-dft.chk

# opt freq 6-311g(d,p) geom=connectivity m062x

| Center<br>Number | Atomic<br>Number | Atomic<br>Type | Coordinates (Angstroms) |           |           |
|------------------|------------------|----------------|-------------------------|-----------|-----------|
|                  |                  |                | X                       | Y         | Z         |
| 1                | 6                | 0              | 2.112104                | -0.514104 | -0.364337 |
| 2                | 6                | 0              | 0.193162                | -1.410230 | 0.400273  |
| 3                | 6                | 0              | 0.043110                | 0.822370  | -0.057655 |
| 4                | 6                | 0              | 1.231348                | 0.580941  | -1.047224 |
| 5                | 1                | 0              | 3.074234                | -0.162440 | -0.001141 |
| 6                | 1                | 0              | 2.247959                | -1.425433 | -0.944973 |
| 7                | 1                | 0              | 1.798951                | 1.507689  | -1.137543 |
| 8                | 1                | 0              | 0.906198                | 0.291975  | -2.045945 |
| 9                | 6                | 0              | -0.899765               | -0.478985 | -0.009828 |
| 10               | 6                | 0              | 0.788716                | 0.578119  | 1.254627  |
| 11               | 1                | 0              | 0.182595                | 0.541037  | 2.156109  |
| 12               | 1                | 0              | 1.651003                | 1.223714  | 1.418641  |
| 13               | 1                | 0              | 0.305949                | -2.427295 | 0.023578  |
| 14               | 7                | 0              | 1.248671                | -0.793038 | 0.888317  |
| 15               | 6                | 0              | -2.100647               | -0.312167 | 0.941880  |
| 16               | 1                | 0              | -2.830039               | 0.340480  | 0.460248  |
| 17               | 1                | 0              | -2.575855               | -1.278891 | 1.111220  |
| 18               | 1                | 0              | -1.836247               | 0.116003  | 1.907023  |
| 19               | 6                | 0              | -1.417042               | -0.963832 | -1.374762 |
| 20               | 1                | 0              | -2.122581               | -1.786353 | -1.248888 |
| 21               | 1                | 0              | -1.944275               | -0.136359 | -1.856009 |
| 22               | 1                | 0              | -0.623547               | -1.291486 | -2.048822 |
| 23               | 6                | 0              | -0.682451               | 2.133233  | -0.255974 |
| 24               | 1                | 0              | 0.023274                | 2.965397  | -0.217713 |
| 25               | 1                | 0              | -1.173408               | 2.164853  | -1.231615 |
| 26               | 1                | 0              | -1.436110               | 2.296305  | 0.515615  |

---

**14T**

%chk=gassman-t-dft.chk

---

# opt freq 6-311g(d,p) geom=connectivity m062x

---

---

| Center<br>Number | Atomic<br>Number | Atomic<br>Type | Coordinates (Angstroms) |           |           |
|------------------|------------------|----------------|-------------------------|-----------|-----------|
|                  |                  |                | X                       | Y         | Z         |
| 1                | 6                | 0              | 1.632108                | -0.961624 | -0.617357 |
| 2                | 6                | 0              | 0.600653                | -1.236835 | 0.519083  |
| 3                | 6                | 0              | 0.037704                | 0.849193  | -0.226139 |
| 4                | 6                | 0              | 1.228255                | 0.445379  | -1.116731 |
| 5                | 1                | 0              | 2.655529                | -1.022157 | -0.250499 |
| 6                | 1                | 0              | 1.501886                | -1.739603 | -1.371115 |
| 7                | 1                | 0              | 2.041757                | 1.168776  | -1.054343 |
| 8                | 1                | 0              | 0.904961                | 0.416728  | -2.158692 |
| 9                | 6                | 0              | -0.718883               | -0.504647 | 0.001982  |
| 10               | 6                | 0              | 0.693065                | 1.069241  | 1.227876  |
| 11               | 1                | 0              | -0.019169               | 1.508406  | 1.934829  |
| 12               | 1                | 0              | 1.615591                | 1.657505  | 1.213348  |
| 13               | 1                | 0              | 0.515623                | -2.258972 | 0.883329  |
| 14               | 7                | 0              | 0.937732                | -0.287541 | 1.519165  |
| 15               | 6                | 0              | -1.826895               | -0.471231 | 1.051378  |
| 16               | 1                | 0              | -2.641185               | 0.167385  | 0.701487  |
| 17               | 1                | 0              | -2.237547               | -1.473190 | 1.189258  |
| 18               | 1                | 0              | -1.511527               | -0.110159 | 2.031059  |
| 19               | 6                | 0              | -1.259770               | -1.148828 | -1.271244 |
| 20               | 1                | 0              | -1.602597               | -2.164077 | -1.062054 |
| 21               | 1                | 0              | -2.129737               | -0.579742 | -1.609774 |
| 22               | 1                | 0              | -0.546330               | -1.190141 | -2.092130 |
| 23               | 6                | 0              | -0.757700               | 2.052745  | -0.668716 |
| 24               | 1                | 0              | -0.118834               | 2.932891  | -0.767839 |
| 25               | 1                | 0              | -1.198335               | 1.854610  | -1.650127 |
| 26               | 1                | 0              | -1.565433               | 2.284169  | 0.028320  |

---

**15S**

%chk=cyclopropylnitrenium-s-CBSAPNO.chk

---

# cbs-apno geom=connectivity

---

| Center<br>Number | Atomic<br>Number | Atomic<br>Type | Coordinates (Angstroms) |           |           |
|------------------|------------------|----------------|-------------------------|-----------|-----------|
|                  |                  |                | X                       | Y         | Z         |
| 1                | 7                | 0              | -1.440073               | 0.000119  | -0.362793 |
| 2                | 1                | 0              | -2.377766               | 0.000087  | 0.056624  |
| 3                | 6                | 0              | -0.522748               | -0.000172 | 0.506086  |
| 4                | 6                | 0              | 0.992649                | -0.696166 | -0.127720 |
| 5                | 6                | 0              | 0.992716                | 0.696228  | -0.127489 |
| 6                | 1                | 0              | -0.563354               | -0.000407 | 1.595014  |
| 7                | 1                | 0              | 0.735847                | -1.245712 | -1.028841 |
| 8                | 1                | 0              | 1.387108                | -1.254796 | 0.719709  |
| 9                | 1                | 0              | 1.387112                | 1.254551  | 0.720172  |
| 10               | 1                | 0              | 0.735865                | 1.246109  | -1.028393 |

---

### 15T

%chk=cyclopropylnitrenium-t-CBSAPNO.chk

# cbs-apno geom=connectivity

---

| Center<br>Number | Atomic<br>Number | Atomic<br>Type | Coordinates (Angstroms) |           |           |
|------------------|------------------|----------------|-------------------------|-----------|-----------|
|                  |                  |                | X                       | Y         | Z         |
| 1                | 7                | 0              | -1.503663               | -0.087752 | -0.191351 |
| 2                | 1                | 0              | -2.207811               | 0.602673  | -0.466463 |
| 3                | 6                | 0              | -0.354007               | -0.081910 | 0.483216  |
| 4                | 6                | 0              | 0.934537                | -0.691060 | -0.200547 |
| 5                | 6                | 0              | 0.890026                | 0.771055  | -0.088693 |
| 6                | 1                | 0              | -0.441634               | -0.203933 | 1.565421  |
| 7                | 1                | 0              | 0.748481                | -1.140604 | -1.171661 |
| 8                | 1                | 0              | 1.533016                | -1.265164 | 0.501051  |
| 9                | 1                | 0              | 1.415043                | 1.274587  | 0.719047  |
| 10               | 1                | 0              | 0.655213                | 1.358201  | -0.971789 |

---

### 16S

%chk=methylcyclopropylnitrenium-s-dft.chk

# opt freq 6-311g(d,p) geom=connectivity rm062x

---

| Center<br>Number | Atomic<br>Number | Atomic<br>Type | Coordinates (Angstroms) |           |           |
|------------------|------------------|----------------|-------------------------|-----------|-----------|
|                  |                  |                | X                       | Y         | Z         |
| 1                | 7                | 0              | -0.797981               | -0.000442 | -0.398086 |
| 2                | 6                | 0              | 0.127607                | 0.002748  | 0.470077  |
| 3                | 6                | 0              | 1.565690                | -0.699838 | -0.112924 |
| 4                | 6                | 0              | 1.566427                | 0.698054  | -0.115688 |
| 5                | 1                | 0              | 0.019815                | 0.005377  | 1.553970  |
| 6                | 1                | 0              | 1.352822                | -1.247584 | -1.022003 |
| 7                | 1                | 0              | 1.967196                | -1.252664 | 0.730843  |
| 8                | 1                | 0              | 1.970187                | 1.253560  | 0.725219  |
| 9                | 1                | 0              | 1.355259                | 1.242168  | -1.027341 |
| 10               | 6                | 0              | -2.172251               | -0.000252 | 0.025173  |
| 11               | 1                | 0              | -2.644312               | -0.874093 | -0.436666 |
| 12               | 1                | 0              | -2.312981               | 0.004243  | 1.107339  |
| 13               | 1                | 0              | -2.646949               | 0.867818  | -0.444589 |

---

## 16T

%chk=methylcyclopropylnitrenium-t-dft.chk

---

# opt freq=noraman 6-311g(d,p) nosymm geom=connectivity um062x

---

---

| Center<br>Number | Atomic<br>Number | Atomic<br>Type | Coordinates (Angstroms) |           |           |
|------------------|------------------|----------------|-------------------------|-----------|-----------|
|                  |                  |                | X                       | Y         | Z         |
| 1                | 7                | 0              | -1.506713               | 0.004889  | -0.182699 |
| 2                | 6                | 0              | -0.336322               | 0.079256  | 0.465333  |
| 3                | 6                | 0              | 0.858477                | -0.767016 | -0.065143 |
| 4                | 6                | 0              | 0.903927                | 0.682041  | -0.282551 |
| 5                | 1                | 0              | -0.415221               | 0.207613  | 1.544812  |
| 6                | 1                | 0              | 0.620924                | -1.407291 | -0.905046 |
| 7                | 1                | 0              | 1.445583                | -1.209215 | 0.729598  |
| 8                | 1                | 0              | 1.508220                | 1.306899  | 0.364203  |
| 9                | 1                | 0              | 0.700942                | 1.065004  | -1.274802 |
| 10               | 6                | 0              | -2.570874               | 0.773745  | -0.714572 |
| 11               | 1                | 0              | -2.171804               | 1.500331  | -1.433116 |
| 12               | 1                | 0              | -3.293994               | 0.112889  | -1.193909 |
| 13               | 1                | 0              | -3.053315               | 1.310958  | 0.114504  |

---

### 16S-ts (ring expansion)

%chk=methylcyclopropylnitreniumringTS-s-dft.chk

---

# opt=(calcfc,qst2) freq=noraman 6-311g(d,p) geom=connectivity m062x

---

Standard orientation:

---

| Center<br>Number | Atomic<br>Number | Atomic<br>Type | Coordinates (Angstroms) |           |           |
|------------------|------------------|----------------|-------------------------|-----------|-----------|
|                  |                  |                | X                       | Y         | Z         |
| 1                | 7                | 0              | -0.660617               | -0.013314 | -0.445852 |
| 2                | 6                | 0              | 0.244146                | -0.646810 | 0.245136  |
| 3                | 6                | 0              | 1.656189                | -0.380930 | -0.205730 |
| 4                | 6                | 0              | 1.049523                | 0.905239  | 0.183344  |
| 5                | 1                | 0              | 1.839912                | -0.503283 | -1.266455 |
| 6                | 1                | 0              | 2.394495                | -0.804409 | 0.465774  |
| 7                | 1                | 0              | 1.048779                | 1.230697  | 1.219697  |
| 8                | 1                | 0              | 0.813318                | 1.643674  | -0.571795 |
| 9                | 1                | 0              | 0.041072                | -1.107662 | 1.215750  |
| 10               | 6                | 0              | -2.015950               | 0.034534  | 0.055324  |
| 11               | 1                | 0              | -2.614026               | -0.525570 | -0.672298 |
| 12               | 1                | 0              | -2.135673               | -0.379284 | 1.058811  |
| 13               | 1                | 0              | -2.367004               | 1.066836  | 0.003035  |

---

### 17S

%chk=tbutylcyclopropylnitrenium-s-dft.chk

---

# opt freq=noraman 6-311g(d,p) geom=connectivity rm062x

---

| Center<br>Number | Atomic<br>Number | Atomic<br>Type | Coordinates (Angstroms) |           |           |
|------------------|------------------|----------------|-------------------------|-----------|-----------|
|                  |                  |                | X                       | Y         | Z         |
| 1                | 7                | 0              | -0.245422               | 0.000192  | -0.404066 |
| 2                | 6                | 0              | -1.193590               | -0.001115 | 0.446261  |
| 3                | 6                | 0              | -2.604687               | 0.700389  | -0.173651 |
| 4                | 6                | 0              | -2.604987               | -0.699718 | -0.175075 |

|    |   |   |           |           |           |
|----|---|---|-----------|-----------|-----------|
| 5  | 1 | 0 | -1.124247 | -0.002325 | 1.530812  |
| 6  | 1 | 0 | -2.371574 | 1.246587  | -1.077930 |
| 7  | 1 | 0 | -3.039489 | 1.251918  | 0.653503  |
| 8  | 1 | 0 | -3.040528 | -1.252654 | 0.650747  |
| 9  | 1 | 0 | -2.372486 | -1.244107 | -1.080602 |
| 10 | 6 | 0 | 1.153822  | -0.000008 | -0.003873 |
| 11 | 6 | 0 | 1.397113  | -0.002315 | 1.499963  |
| 12 | 1 | 0 | 0.985635  | -0.895718 | 1.977406  |
| 13 | 1 | 0 | 2.471658  | -0.001756 | 1.684455  |
| 14 | 1 | 0 | 0.984166  | 0.888796  | 1.980408  |
| 15 | 6 | 0 | 1.744858  | -1.257528 | -0.675486 |
| 16 | 1 | 0 | 1.560356  | -1.246923 | -1.749392 |
| 17 | 1 | 0 | 2.821790  | -1.257892 | -0.499158 |
| 18 | 1 | 0 | 1.322404  | -2.166472 | -0.243912 |
| 19 | 6 | 0 | 1.743976  | 1.260057  | -0.671510 |
| 20 | 1 | 0 | 2.820850  | 1.260836  | -0.494827 |
| 21 | 1 | 0 | 1.559824  | 1.252491  | -1.745498 |
| 22 | 1 | 0 | 1.320565  | 2.167309  | -0.237330 |

17T

%chk=tbutylcyclopropylnitrenium-t-dft.chk

# opt freq=noraman 6-311g(d,p) geom=connectivity um062x

| Center<br>Number | Atomic<br>Number | Atomic<br>Type | Coordinates (Angstroms) |           |           |
|------------------|------------------|----------------|-------------------------|-----------|-----------|
|                  |                  |                | X                       | Y         | Z         |
| 1                | 7                | 0              | 0.172851                | -0.510634 | -0.085088 |
| 2                | 6                | 0              | 1.387046                | -0.377999 | 0.482985  |
| 3                | 6                | 0              | 2.640053                | -0.590171 | -0.404200 |
| 4                | 6                | 0              | 2.321300                | 0.781679  | 0.012865  |
| 5                | 1                | 0              | 1.446693                | -0.715378 | 1.517367  |
| 6                | 1                | 0              | 2.431740                | -0.878343 | -1.426351 |
| 7                | 1                | 0              | 3.433418                | -1.129805 | 0.096210  |
| 8                | 1                | 0              | 2.870581                | 1.236420  | 0.828072  |
| 9                | 1                | 0              | 1.889584                | 1.455569  | -0.715463 |
| 10               | 6                | 0              | -1.172415               | -0.004019 | -0.040229 |
| 11               | 6                | 0              | -1.612082               | -0.126431 | 1.439207  |
| 12               | 1                | 0              | -2.638279               | 0.241932  | 1.497241  |
| 13               | 1                | 0              | -1.594558               | -1.165415 | 1.769434  |

|    |   |   |           |           |           |
|----|---|---|-----------|-----------|-----------|
| 14 | 1 | 0 | -0.983721 | 0.484654  | 2.088844  |
| 15 | 6 | 0 | -2.051050 | -0.860560 | -0.957014 |
| 16 | 1 | 0 | -3.074090 | -0.487255 | -0.899516 |
| 17 | 1 | 0 | -1.714464 | -0.792574 | -1.991927 |
| 18 | 1 | 0 | -2.041751 | -1.904516 | -0.642734 |
| 19 | 6 | 0 | -1.140823 | 1.469245  | -0.489550 |
| 20 | 1 | 0 | -0.519691 | 2.071638  | 0.174965  |
| 21 | 1 | 0 | -0.784067 | 1.558640  | -1.516591 |
| 22 | 1 | 0 | -2.163529 | 1.848408  | -0.448324 |

**18S**

%chk=cyclobutylnitrenium-s-dft.chk

# opt=rcfc freq=noraman 6-311g(d,p) geom=connectivity rm062x

| Center<br>Number | Atomic<br>Number | Atomic<br>Type | Coordinates (Angstroms) |           |           |
|------------------|------------------|----------------|-------------------------|-----------|-----------|
|                  |                  |                | X                       | Y         | Z         |
| 1                | 6                | 0              | 1.211224                | 0.847023  | 0.184785  |
| 2                | 6                | 0              | -1.109424               | -0.299557 | 0.328473  |
| 3                | 6                | 0              | 0.135907                | -0.237300 | -0.536516 |
| 4                | 6                | 0              | 1.783543                | -0.423755 | 0.152747  |
| 5                | 1                | 0              | 1.504758                | 1.593349  | -0.542443 |
| 6                | 1                | 0              | 0.757228                | 1.209835  | 1.099718  |
| 7                | 1                | 0              | -1.007126               | -0.788355 | 1.303854  |
| 8                | 1                | 0              | -0.011350               | 0.223219  | -1.513444 |
| 9                | 1                | 0              | 0.432621                | -1.279468 | -0.780804 |
| 10               | 1                | 0              | 2.464797                | -0.709831 | -0.641907 |
| 11               | 1                | 0              | 1.696756                | -1.094677 | 1.001975  |
| 12               | 7                | 0              | -2.143964               | 0.202185  | -0.164346 |
| 13               | 1                | 0              | -2.957435               | 0.112162  | 0.446542  |

**18T**

%chk=cyclobutylnitrenium-t-dft.chk

# opt=calcfc freq=noraman 6-311g(d,p) geom=connectivity m062x



| Center<br>Number | Atomic<br>Number | Atomic<br>Type | Coordinates (Angstroms) |           |           |
|------------------|------------------|----------------|-------------------------|-----------|-----------|
|                  |                  |                | X                       | Y         | Z         |
| 1                | 6                | 0              | -0.420184               | -1.111475 | -0.086601 |
| 2                | 6                | 0              | 0.616565                | 0.000231  | 0.446870  |
| 3                | 6                | 0              | -0.420052               | 1.111452  | -0.086702 |
| 4                | 6                | 0              | -1.485197               | -0.000034 | -0.067592 |
| 5                | 1                | 0              | -0.148638               | -1.433469 | -1.090715 |
| 6                | 1                | 0              | -0.512557               | -1.957066 | 0.590279  |
| 7                | 1                | 0              | 0.655259                | -0.000164 | 1.543207  |
| 8                | 1                | 0              | -0.148474               | 1.433205  | -1.090879 |
| 9                | 1                | 0              | -0.512971               | 1.957174  | 0.589942  |
| 10               | 1                | 0              | -2.166618               | -0.000069 | -0.915980 |
| 11               | 1                | 0              | -2.042297               | -0.000001 | 0.868194  |
| 12               | 7                | 0              | 1.834887                | 0.000014  | -0.101315 |
| 13               | 1                | 0              | 2.285295                | -0.000757 | -1.020696 |

**19S**

%chk=Vinylnitrenium-s-CBSAPNO.chk

# cbs-apno geom=connectivity

| Center<br>Number | Atomic<br>Number | Atomic<br>Type | Coordinates (Angstroms) |           |           |
|------------------|------------------|----------------|-------------------------|-----------|-----------|
|                  |                  |                | X                       | Y         | Z         |
| 1                | 7                | 0              | -1.088691               | -0.363713 | -0.000180 |
| 2                | 6                | 0              | -0.092268               | 0.477668  | -0.000032 |
| 3                | 6                | 0              | 1.173144                | -0.181899 | 0.000212  |
| 4                | 1                | 0              | -0.164676               | 1.565666  | -0.000075 |
| 5                | 1                | 0              | 2.120277                | 0.362348  | 0.000368  |
| 6                | 1                | 0              | 1.178780                | -1.274344 | 0.000232  |
| 7                | 1                | 0              | -1.998798               | 0.117710  | -0.000346 |

**19T**

%chk=Vinylnitrenium-t-CBSAPNO.chk

# cbs-apno geom=connectivity

| Center<br>Number | Atomic<br>Number | Atomic<br>Type | Coordinates (Angstroms) |           |           |
|------------------|------------------|----------------|-------------------------|-----------|-----------|
|                  |                  |                | X                       | Y         | Z         |
| 1                | 7                | 0              | -1.155415               | -0.255016 | -0.000210 |
| 2                | 6                | 0              | -0.056132               | 0.410093  | -0.000026 |
| 3                | 6                | 0              | 1.224295                | -0.189860 | 0.000227  |
| 4                | 1                | 0              | -0.174816               | 1.504559  | -0.000111 |
| 5                | 1                | 0              | 2.100089                | 0.449208  | 0.000359  |
| 6                | 1                | 0              | 1.329005                | -1.270279 | 0.000305  |
| 7                | 1                | 0              | -2.175350               | -0.219777 | -0.000290 |

## 20S

%chk=Vinylmethylnitrenium-s-dft .chk

# opt freq 6-311g(d,p) geom=connectivity m062x

| Center<br>Number | Atomic<br>Number | Atomic<br>Type | Coordinates (Angstroms) |           |           |
|------------------|------------------|----------------|-------------------------|-----------|-----------|
|                  |                  |                | X                       | Y         | Z         |
| 1                | 7                | 0              | -0.406884               | -0.424363 | 0.000384  |
| 2                | 6                | 0              | -1.736061               | 0.044366  | -0.000215 |
| 3                | 1                | 0              | -2.233403               | -0.442041 | -0.856701 |
| 4                | 1                | 0              | -2.234778               | -0.441356 | 0.855646  |
| 5                | 1                | 0              | -1.866759               | 1.127058  | -0.000693 |
| 6                | 6                | 0              | 0.580281                | 0.441705  | 0.000338  |
| 7                | 6                | 0              | 1.838061                | -0.151287 | -0.000182 |
| 8                | 1                | 0              | 0.438117                | 1.521961  | 0.000433  |
| 9                | 1                | 0              | 2.754927                | 0.433165  | -0.001228 |
| 10               | 1                | 0              | 1.896392                | -1.236949 | 0.000211  |

## 20T

%chk=Vinylmethylnitrenium-t-dft .chk

# opt freq 6-311g(d,p) geom=connectivity um062x

|   |   |   |           |           |           |
|---|---|---|-----------|-----------|-----------|
| 1 | 7 | 0 | -0.453850 | -0.141876 | -0.000314 |
| 2 | 6 | 0 | -1.865812 | -0.080899 | -0.000038 |
| 3 | 1 | 0 | -2.254021 | -0.553626 | -0.905080 |
| 4 | 1 | 0 | -2.253560 | -0.565840 | 0.898917  |
| 5 | 1 | 0 | -2.147222 | 0.983752  | 0.008409  |

|    |   |   |          |           |           |
|----|---|---|----------|-----------|-----------|
| 6  | 6 | 0 | 0.694054 | 0.439595  | -0.000174 |
| 7  | 6 | 0 | 1.905835 | -0.254189 | 0.000094  |
| 8  | 1 | 0 | 0.668598 | 1.535706  | -0.000158 |
| 9  | 1 | 0 | 2.832502 | 0.301964  | 0.000553  |
| 10 | 1 | 0 | 1.926191 | -1.335869 | 0.000268  |

---

## 20S-ts

%chk=VinylmethylnitreniumTS-s-dft .chk

---

# opt=qst2 freq=noraman 6-311g(d,p) geom=connectivity m062x

---

| Center<br>Number | Atomic<br>Number | Atomic<br>Type | Coordinates (Angstroms) |           |           |
|------------------|------------------|----------------|-------------------------|-----------|-----------|
|                  |                  |                | X                       | Y         | Z         |
| 1                | 7                | 0              | 0.024997                | -0.516253 | -0.032354 |
| 2                | 6                | 0              | 1.187721                | 0.178173  | -0.040747 |
| 3                | 1                | 0              | 2.049060                | -0.384307 | -0.407400 |
| 4                | 1                | 0              | 1.175710                | 1.266767  | -0.138217 |
| 5                | 6                | 0              | -1.187386               | 0.164868  | 0.023041  |
| 6                | 1                | 0              | -1.149719               | 1.248118  | 0.152222  |
| 7                | 1                | 0              | -1.543797               | -0.091764 | -1.009995 |
| 8                | 1                | 0              | -1.907688               | -0.375365 | 0.646608  |
| 9                | 1                | 0              | 1.199439                | -0.107927 | 1.089501  |

---

## 21S

\*\*\*\*\*

%chk=Vinyltbutylnitrenium-s-dft .chk

---

# opt freq=noraman 6-311g(d,p) geom=connectivity rm062x

---

| Center<br>Number | Atomic<br>Number | Atomic<br>Type | Coordinates (Angstroms) |   |   |
|------------------|------------------|----------------|-------------------------|---|---|
|                  |                  |                | X                       | Y | Z |

---

|    |   |   |           |           |           |
|----|---|---|-----------|-----------|-----------|
| 1  | 7 | 0 | -0.570921 | -0.447829 | -0.154597 |
| 2  | 6 | 0 | 0.749070  | 0.015315  | -0.064808 |
| 3  | 6 | 0 | -1.608957 | 0.369043  | -0.008277 |
| 4  | 6 | 0 | -2.828326 | -0.260202 | -0.119137 |
| 5  | 1 | 0 | -1.520164 | 1.442353  | 0.137636  |
| 6  | 1 | 0 | -3.765601 | 0.287856  | -0.083797 |
| 7  | 1 | 0 | -2.848502 | -1.336182 | -0.265180 |
| 8  | 6 | 0 | 0.992973  | 1.517683  | -0.125044 |
| 9  | 1 | 0 | 0.521081  | 2.055751  | 0.699340  |
| 10 | 1 | 0 | 2.065402  | 1.703743  | -0.065417 |
| 11 | 1 | 0 | 0.636797  | 1.927884  | -1.073680 |
| 12 | 6 | 0 | 1.629348  | -0.789614 | -1.035452 |
| 13 | 1 | 0 | 2.677662  | -0.615635 | -0.791585 |
| 14 | 1 | 0 | 1.411058  | -1.854606 | -0.966144 |
| 15 | 1 | 0 | 1.446367  | -0.452978 | -2.057142 |
| 16 | 6 | 0 | 1.052325  | -0.536522 | 1.414312  |
| 17 | 1 | 0 | 0.915553  | -1.613629 | 1.466753  |
| 18 | 1 | 0 | 2.103600  | -0.278026 | 1.560519  |
| 19 | 1 | 0 | 0.434597  | -0.025946 | 2.151306  |

## 21T

%chk=Vinyltbutylnitrenium-t-dft .chk

# opt freq 6-311g(d,p) geom=connectivity m062x

| Center Number | Atomic Number | Atomic Type | Coordinates (Angstroms) |           |           |
|---------------|---------------|-------------|-------------------------|-----------|-----------|
|               |               |             | X                       | Y         | Z         |
| 1             | 7             | 0           | -0.593297               | -0.185245 | -0.000263 |
| 2             | 6             | 0           | 0.834012                | -0.046113 | 0.000141  |
| 3             | 6             | 0           | -1.751210               | 0.381849  | -0.000327 |
| 4             | 6             | 0           | -2.951226               | -0.330121 | -0.000546 |
| 5             | 1             | 0           | -1.745920               | 1.477392  | -0.000245 |
| 6             | 1             | 0           | -3.888262               | 0.207821  | -0.000621 |
| 7             | 1             | 0           | -2.952937               | -1.411657 | -0.000651 |
| 8             | 6             | 0           | 1.084449                | 1.488373  | 0.000292  |
| 9             | 1             | 0           | 0.675253                | 1.955059  | 0.897155  |
| 10            | 1             | 0           | 2.168129                | 1.618779  | 0.000537  |
| 11            | 1             | 0           | 0.675642                | 1.955161  | -0.896695 |
| 12            | 6             | 0           | 1.390374                | -0.696259 | -1.273270 |
| 13            | 1             | 0           | 2.471548                | -0.551906 | -1.282205 |

|    |   |   |          |           |           |
|----|---|---|----------|-----------|-----------|
| 14 | 1 | 0 | 1.184651 | -1.766826 | -1.281643 |
| 15 | 1 | 0 | 0.967557 | -0.237960 | -2.167825 |
| 16 | 6 | 0 | 1.389655 | -0.696390 | 1.273803  |
| 17 | 1 | 0 | 1.183815 | -1.766936 | 1.282014  |
| 18 | 1 | 0 | 2.470841 | -0.552152 | 1.283292  |
| 19 | 1 | 0 | 0.966436 | -0.238091 | 2.168168  |

---

## 21S-ts

%chk=VinyltbutylnitreniumTS-s-dft.chk

---

# opt=qst3 freq=noraman 6-311g(d,p) geom=connectivity rm062x

---

| Center<br>Number | Atomic<br>Number | Atomic<br>Type | Coordinates (Angstroms) |           |           |
|------------------|------------------|----------------|-------------------------|-----------|-----------|
|                  |                  |                | X                       | Y         | Z         |
| 1                | 7                | 0              | -0.477859               | -0.393696 | -0.287418 |
| 2                | 6                | 0              | 0.787120                | 0.068673  | -0.146262 |
| 3                | 6                | 0              | -1.576121               | 0.393715  | -0.033218 |
| 4                | 6                | 0              | -2.766991               | -0.177722 | -0.297309 |
| 5                | 1                | 0              | -1.477797               | 1.426122  | 0.287028  |
| 6                | 1                | 0              | -3.691040               | 0.383741  | -0.220697 |
| 7                | 1                | 0              | -2.807773               | -1.212435 | -0.619713 |
| 8                | 6                | 0              | 0.571817                | -0.789445 | 1.365330  |
| 9                | 6                | 0              | 1.829916                | -0.712586 | -0.915787 |
| 10               | 1                | 0              | -0.167289               | -0.333608 | 2.015254  |
| 11               | 1                | 0              | 1.587826                | -0.532770 | 1.681470  |
| 12               | 1                | 0              | 0.451765                | -1.857735 | 1.229503  |
| 13               | 1                | 0              | 1.526115                | -1.749900 | -1.049199 |
| 14               | 1                | 0              | 2.798288                | -0.662497 | -0.417206 |
| 15               | 1                | 0              | 1.931215                | -0.250614 | -1.901228 |
| 16               | 6                | 0              | 1.094750                | 1.526696  | 0.114392  |
| 17               | 1                | 0              | 0.525979                | 1.945276  | 0.944650  |
| 18               | 1                | 0              | 2.156574                | 1.644871  | 0.328620  |
| 19               | 1                | 0              | 0.868202                | 2.099437  | -0.789432 |

---

## 22S

%chk=phenylnitrenium.chk

---

```
# ccsd=(t,saveamplitudes)/cc-pvtz guess=save geom=connectivity
```

---

| Center<br>Number | Atomic<br>Number | Atomic<br>Type | Coordinates (Angstroms) |           |          |
|------------------|------------------|----------------|-------------------------|-----------|----------|
|                  |                  |                | X                       | Y         | Z        |
| 1                | 7                | 0              | -0.096175               | 2.292100  | 0.000000 |
| 2                | 6                | 0              | 0.000000                | 1.012322  | 0.000000 |
| 3                | 6                | 0              | -1.261421               | 0.271627  | 0.000000 |
| 4                | 6                | 0              | 1.261443                | 0.270716  | 0.000000 |
| 5                | 6                | 0              | -1.252345               | -1.093271 | 0.000000 |
| 6                | 1                | 0              | -2.171811               | 0.861434  | 0.000000 |
| 7                | 6                | 0              | 1.239398                | -1.088516 | 0.000000 |
| 8                | 1                | 0              | 2.192700                | 0.828585  | 0.000000 |
| 9                | 6                | 0              | -0.011104               | -1.758105 | 0.000000 |
| 10               | 1                | 0              | -2.171313               | -1.664786 | 0.000000 |
| 11               | 1                | 0              | 2.153742                | -1.667703 | 0.000000 |
| 12               | 1                | 0              | -0.008005               | -2.844472 | 0.000000 |
| 13               | 1                | 0              | 0.822084                | 2.753593  | 0.000000 |

## 22T

```
%chk=phenylnitrenium-t-ccsd.chk
```

```
# uccsd=(t,readamplitudes,saveamplitudes)/cc-pvtz guess=(read,save) geom=connectivity
```

---

| Center<br>Number | Atomic<br>Number | Atomic<br>Type | Coordinates (Angstroms) |           |           |
|------------------|------------------|----------------|-------------------------|-----------|-----------|
|                  |                  |                | X                       | Y         | Z         |
| 1                | 7                | 0              | -0.030205               | 2.300272  | 0.000000  |
| 2                | 6                | 0              | 0.016144                | 0.981733  | 0.000000  |
| 3                | 6                | 0              | -0.014507               | 0.273341  | 1.250860  |
| 4                | 6                | 0              | -0.014507               | 0.273341  | -1.250860 |
| 5                | 6                | 0              | -0.014507               | -1.093549 | 1.229393  |
| 6                | 1                | 0              | -0.026874               | 0.838412  | 2.174171  |
| 7                | 6                | 0              | -0.014507               | -1.093549 | -1.229393 |
| 8                | 1                | 0              | -0.026874               | 0.838412  | -2.174171 |
| 9                | 6                | 0              | -0.014876               | -1.784264 | 0.000000  |
| 10               | 1                | 0              | -0.020961               | -1.648860 | 2.158733  |
| 11               | 1                | 0              | -0.020961               | -1.648860 | -2.158733 |
| 12               | 1                | 0              | -0.022647               | -2.867592 | 0.000000  |

13 1 0 0.670312 3.044267 0.000000

---

### 23S

%chk=phenylmethylnitrenium-s-dft .chk

---

# opt freq=noraman 6-311g(d,p) geom=connectivity m062x

---

| Center<br>Number | Atomic<br>Number | Atomic<br>Type | Coordinates (Angstroms) |           |           |
|------------------|------------------|----------------|-------------------------|-----------|-----------|
|                  |                  |                | X                       | Y         | Z         |
| 1                | 7                | 0              | 1.733504                | -0.637694 | -0.000048 |
| 2                | 6                | 0              | 0.495967                | -0.240249 | -0.000343 |
| 3                | 6                | 0              | -0.474169               | -1.319160 | -0.000240 |
| 4                | 6                | 0              | 0.021904                | 1.132466  | -0.000399 |
| 5                | 6                | 0              | -1.817549               | -1.049809 | 0.000109  |
| 6                | 1                | 0              | -0.075775               | -2.327520 | -0.000349 |
| 7                | 6                | 0              | -1.319540               | 1.373678  | 0.000004  |
| 8                | 1                | 0              | 0.723974                | 1.955544  | -0.000748 |
| 9                | 6                | 0              | -2.229574               | 0.289605  | 0.000330  |
| 10               | 1                | 0              | -2.550029               | -1.846233 | 0.000269  |
| 11               | 1                | 0              | -1.700761               | 2.386626  | 0.000045  |
| 12               | 1                | 0              | -3.292772               | 0.509732  | 0.000755  |
| 13               | 6                | 0              | 2.852429                | 0.240792  | 0.000351  |
| 14               | 1                | 0              | 3.464881                | -0.044755 | 0.865597  |
| 15               | 1                | 0              | 3.465704                | -0.045026 | -0.864221 |
| 16               | 1                | 0              | 2.653442                | 1.311548  | 0.000120  |

---

### 23T

%chk=phenylmethylnitrenium-t-dft .chk

---

# opt freq=noraman 6-311g(d,p) geom=connectivity m062x

---

| Center<br>Number | Atomic<br>Number | Atomic<br>Type | Coordinates (Angstroms) |           |          |
|------------------|------------------|----------------|-------------------------|-----------|----------|
|                  |                  |                | X                       | Y         | Z        |
| 1                | 7                | 0              | -1.736750               | 0.398863  | 0.019455 |
| 2                | 6                | 0              | -0.444736               | 0.198796  | 0.009419 |
| 3                | 6                | 0              | 0.061579                | -1.145907 | 0.009049 |

|    |   |   |           |           |           |
|----|---|---|-----------|-----------|-----------|
| 4  | 6 | 0 | 0.450272  | 1.316849  | 0.003212  |
| 5  | 6 | 0 | 1.419090  | -1.333312 | -0.000738 |
| 6  | 1 | 0 | -0.631839 | -1.977272 | 0.014334  |
| 7  | 6 | 0 | 1.800661  | 1.081060  | -0.005674 |
| 8  | 1 | 0 | 0.039563  | 2.318002  | 0.005208  |
| 9  | 6 | 0 | 2.293540  | -0.233468 | -0.007816 |
| 10 | 1 | 0 | 1.817349  | -2.340201 | -0.002757 |
| 11 | 1 | 0 | 2.489369  | 1.916071  | -0.011197 |
| 12 | 1 | 0 | 3.362834  | -0.403673 | -0.014718 |
| 13 | 6 | 0 | -3.042056 | -0.139582 | -0.019053 |
| 14 | 1 | 0 | -3.167739 | -0.849983 | 0.806274  |
| 15 | 1 | 0 | -3.752778 | 0.681465  | 0.128481  |
| 16 | 1 | 0 | -3.229613 | -0.603070 | -0.992208 |

---

### 23S-ts

%chk=phenylmethylnitreniumTS-s-dft .chk

---

# opt=(calcfc,qst2) freq 6-311g(d,p) geom=connectivity m062x

---

| Center<br>Number | Atomic<br>Number | Atomic<br>Type | Coordinates (Angstroms) |           |           |
|------------------|------------------|----------------|-------------------------|-----------|-----------|
|                  |                  |                | X                       | Y         | Z         |
| 1                | 7                | 0              | -1.812320               | -0.558323 | -0.120688 |
| 2                | 6                | 0              | -0.476315               | -0.204687 | -0.037431 |
| 3                | 6                | 0              | 0.411502                | -1.295215 | -0.021038 |
| 4                | 6                | 0              | -0.000096               | 1.122954  | -0.034149 |
| 5                | 6                | 0              | 1.774684                | -1.063416 | 0.022539  |
| 6                | 1                | 0              | 0.002064                | -2.298057 | -0.045106 |
| 7                | 6                | 0              | 1.360094                | 1.337078  | -0.000922 |
| 8                | 1                | 0              | -0.672777               | 1.970682  | -0.080679 |
| 9                | 6                | 0              | 2.242689                | 0.247792  | 0.034039  |
| 10               | 1                | 0              | 2.468954                | -1.893069 | 0.039244  |
| 11               | 1                | 0              | 1.749556                | 2.346752  | -0.009354 |
| 12               | 1                | 0              | 3.309966                | 0.433983  | 0.060755  |
| 13               | 6                | 0              | -2.834724               | 0.294381  | 0.022714  |
| 14               | 1                | 0              | -3.824384               | -0.114844 | -0.170737 |
| 15               | 1                | 0              | -2.502499               | -0.537750 | 0.965047  |
| 16               | 1                | 0              | -2.711644               | 1.367241  | 0.171132  |

---



**24S**

%chk=phenyltertbutylnitrenium-s-dft .chk

---

# opt freq=noraman 6-311g(d,p) geom=connectivity rm062x

---

| Center<br>Number | Atomic<br>Number | Atomic<br>Type | Coordinates (Angstroms) |           |           |
|------------------|------------------|----------------|-------------------------|-----------|-----------|
|                  |                  |                | X                       | Y         | Z         |
| 1                | 7                | 0              | -0.674256               | 0.685375  | -0.000278 |
| 2                | 6                | 0              | 0.559302                | 0.255996  | -0.000216 |
| 3                | 6                | 0              | 1.522076                | 1.341813  | -0.000155 |
| 4                | 6                | 0              | 1.063810                | -1.105977 | -0.000105 |
| 5                | 6                | 0              | 2.871321                | 1.099419  | 0.000050  |
| 6                | 1                | 0              | 1.110845                | 2.344432  | -0.000255 |
| 7                | 6                | 0              | 2.413223                | -1.320605 | -0.000010 |
| 8                | 1                | 0              | 0.388920                | -1.945590 | -0.000173 |
| 9                | 6                | 0              | 3.308567                | -0.229901 | 0.000073  |
| 10               | 1                | 0              | 3.586373                | 1.911432  | 0.000158  |
| 11               | 1                | 0              | 2.805923                | -2.329171 | 0.000008  |
| 12               | 1                | 0              | 4.374636                | -0.433930 | 0.000184  |
| 13               | 6                | 0              | -1.919594               | -0.014843 | -0.000002 |
| 14               | 6                | 0              | -2.646773               | 0.543530  | -1.256276 |
| 15               | 6                | 0              | -1.956184               | -1.539351 | -0.000111 |
| 16               | 6                | 0              | -2.645952               | 0.543313  | 1.256815  |
| 17               | 1                | 0              | -2.668454               | 1.631817  | -1.238246 |
| 18               | 1                | 0              | -2.151486               | 0.204499  | -2.167209 |
| 19               | 1                | 0              | -3.667963               | 0.158964  | -1.243355 |
| 20               | 1                | 0              | -1.495702               | -1.961517 | 0.895988  |
| 21               | 1                | 0              | -3.001340               | -1.852088 | -0.000043 |
| 22               | 1                | 0              | -1.495837               | -1.961350 | -0.896358 |
| 23               | 1                | 0              | -3.667105               | 0.158632  | 1.244557  |
| 24               | 1                | 0              | -2.149998               | 0.204283  | 2.167393  |
| 25               | 1                | 0              | -2.667791               | 1.631601  | 1.238914  |

---

**24T**

%chk=phenylterbutylnitrenium-t-dft .chk

---

# opt freq 6-311g(d,p) geom=connectivity um062x

---

| Center Number | Atomic Number | Atomic Type | Coordinates (Angstroms) |           |           |
|---------------|---------------|-------------|-------------------------|-----------|-----------|
|               |               |             | X                       | Y         | Z         |
| 1             | 7             | 0           | 0.699645                | -0.000217 | -0.584361 |
| 2             | 6             | 0           | -0.597078               | -0.000120 | -0.318045 |
| 3             | 6             | 0           | -1.297921               | 1.241876  | -0.212990 |
| 4             | 6             | 0           | -1.298117               | -1.242006 | -0.213004 |
| 5             | 6             | 0           | -2.648024               | 1.222123  | 0.034882  |
| 6             | 1             | 0           | -0.749551               | 2.168222  | -0.327550 |
| 7             | 6             | 0           | -2.648218               | -1.222038 | 0.034865  |
| 8             | 1             | 0           | -0.749886               | -2.168433 | -0.327573 |
| 9             | 6             | 0           | -3.326648               | 0.000095  | 0.159804  |
| 10            | 1             | 0           | -3.190822               | 2.153942  | 0.129503  |
| 11            | 1             | 0           | -3.191160               | -2.153774 | 0.129473  |
| 12            | 1             | 0           | -4.392922               | 0.000183  | 0.349782  |
| 13            | 6             | 0           | 2.007709                | -0.000017 | 0.027997  |
| 14            | 6             | 0           | 2.085714                | 1.270481  | 0.898938  |
| 15            | 6             | 0           | 2.085950                | -1.270182 | 0.899392  |
| 16            | 6             | 0           | 3.070453                | -0.000112 | -1.070325 |
| 17            | 1             | 0           | 2.010386                | 2.170023  | 0.286533  |
| 18            | 1             | 0           | 1.305650                | 1.273929  | 1.662265  |
| 19            | 1             | 0           | 3.059516                | 1.270976  | 1.392235  |
| 20            | 1             | 0           | 2.011163                | -2.169953 | 0.287261  |
| 21            | 1             | 0           | 3.059593                | -1.270107 | 1.393004  |
| 22            | 1             | 0           | 1.305665                | -1.273692 | 1.662494  |
| 23            | 1             | 0           | 4.056116                | 0.000089  | -0.603129 |
| 24            | 1             | 0           | 2.983004                | -0.888717 | -1.696248 |
| 25            | 1             | 0           | 2.982809                | 0.888228  | -1.696598 |

**25S**

%chk=methoxynitrenium-s-CBSAPNO.chk

-----

# cbs-apno geom=connectivity

-----

-----

| Center | Atomic | Atomic | Coordinates (Angstroms) |  |  |
|--------|--------|--------|-------------------------|--|--|
|--------|--------|--------|-------------------------|--|--|

| Number | Number | Type | X         | Y         | Z         |
|--------|--------|------|-----------|-----------|-----------|
| 1      | 6      | 0    | 1.184813  | 0.142662  | 0.000000  |
| 2      | 1      | 0    | 1.059481  | 1.224940  | -0.000002 |
| 3      | 1      | 0    | 1.638736  | -0.262045 | 0.905373  |
| 4      | 1      | 0    | 1.638738  | -0.262049 | -0.905370 |
| 5      | 8      | 0    | -0.197065 | -0.460140 | 0.000000  |
| 6      | 7      | 0    | -1.125820 | 0.338750  | 0.000000  |
| 7      | 1      | 0    | -1.988577 | -0.246946 | 0.000000  |

## 25T

%chk=methoxynitrenium-t-CBSAPNO.chk

# cbs-apno geom=connectivity

| Center Number | Atomic Number | Atomic Type | Coordinates (Angstroms) |           |           |
|---------------|---------------|-------------|-------------------------|-----------|-----------|
|               |               |             | X                       | Y         | Z         |
| 1             | 6             | 0           | 1.210728                | 0.177064  | -0.011264 |
| 2             | 1             | 0           | 1.344526                | 0.547424  | 1.004729  |
| 3             | 1             | 0           | 1.854763                | -0.663392 | -0.256770 |
| 4             | 1             | 0           | 1.186476                | 0.955758  | -0.773241 |
| 5             | 8             | 0           | -0.176686               | -0.480925 | -0.023685 |
| 6             | 7             | 0           | -1.194193               | 0.218782  | 0.129909  |
| 7             | 1             | 0           | -1.877292               | 0.413754  | -0.627017 |

## 26S

%chk=Methoxymethylnitrenium-s-dft .chk

# opt freq=noraman 6-311g(d,p) nosymm geom=connectivity m062x

|   |   |   |           |           |           |
|---|---|---|-----------|-----------|-----------|
| 1 | 7 | 0 | -0.327972 | 0.689743  | -0.405877 |
| 2 | 6 | 0 | 1.052347  | 0.660282  | -0.047154 |
| 3 | 1 | 0 | 1.302023  | -0.408200 | 0.030445  |
| 4 | 1 | 0 | 1.585162  | 1.003677  | -0.946258 |
| 5 | 1 | 0 | 1.286217  | 1.233021  | 0.848023  |
| 6 | 8 | 0 | -0.997821 | 1.360772  | 0.364573  |

|    |   |   |           |          |           |
|----|---|---|-----------|----------|-----------|
| 7  | 6 | 0 | -2.447956 | 1.450483 | 0.071751  |
| 8  | 1 | 0 | -2.929872 | 1.054500 | 0.963333  |
| 9  | 1 | 0 | -2.636651 | 2.515950 | -0.042847 |
| 10 | 1 | 0 | -2.639805 | 0.870252 | -0.827050 |

## 26T

%chk=Methoxymethylnitrenium-t-dft.chk

# opt freq=noraman 6-311g(d,p) nosymm geom=connectivity m062x

| Center<br>Number | Atomic<br>Number | Atomic<br>Type | Coordinates (Angstroms) |           |           |
|------------------|------------------|----------------|-------------------------|-----------|-----------|
|                  |                  |                | X                       | Y         | Z         |
| 1                | 7                | 0              | -0.285026               | 0.629212  | 0.612435  |
| 2                | 6                | 0              | 1.022188                | 0.603571  | -0.035370 |
| 3                | 1                | 0              | 1.450894                | -0.377775 | 0.153100  |
| 4                | 1                | 0              | 0.879472                | 0.788012  | -1.104564 |
| 5                | 1                | 0              | 1.620654                | 1.393578  | 0.433067  |
| 6                | 8                | 0              | -1.091935               | 1.577013  | 0.662266  |
| 7                | 6                | 0              | -2.394906               | 1.462026  | -0.076231 |
| 8                | 1                | 0              | -2.961451               | 0.679698  | 0.423463  |
| 9                | 1                | 0              | -2.834112               | 2.445045  | 0.053736  |
| 10               | 1                | 0              | -2.160106               | 1.230097  | -1.112963 |

## 26S-ts

%chk=MethoxymethylnitreniumTS-s-dft.chk

# opt=(calcf,ts) freq=noraman 6-311g(d,p) geom=connectivity m062x

| Center<br>Number | Atomic<br>Number | Atomic<br>Type | Coordinates (Angstroms) |           |           |
|------------------|------------------|----------------|-------------------------|-----------|-----------|
|                  |                  |                | X                       | Y         | Z         |
| 1                | 7                | 0              | 0.533230                | -0.405965 | -0.126174 |
| 2                | 6                | 0              | 1.761591                | 0.096601  | -0.013444 |
| 3                | 1                | 0              | 1.144991                | -0.676738 | 0.933912  |
| 4                | 1                | 0              | 2.566567                | -0.608329 | -0.209213 |
| 5                | 1                | 0              | 1.920093                | 1.165075  | 0.140378  |
| 6                | 8                | 0              | -0.412338               | 0.475697  | -0.000152 |
| 7                | 6                | 0              | -1.748283               | -0.120868 | 0.010647  |

|    |   |   |           |           |           |
|----|---|---|-----------|-----------|-----------|
| 8  | 1 | 0 | -1.925154 | -0.557629 | 0.992117  |
| 9  | 1 | 0 | -2.411262 | 0.719160  | -0.170965 |
| 10 | 1 | 0 | -1.808983 | -0.859754 | -0.785011 |

---

## 27S

%chk=Methoxytbutylnitrenium-s-dft .chk

---

# opt freq=noraman 6-311g(d,p) geom=connectivity m062x

---

---

| Center<br>Number | Atomic<br>Number | Atomic<br>Type | Coordinates (Angstroms) |           |           |
|------------------|------------------|----------------|-------------------------|-----------|-----------|
|                  |                  |                | X                       | Y         | Z         |
| 1                | 7                | 0              | -0.497620               | -0.530246 | 0.011895  |
| 2                | 6                | 0              | 0.826203                | 0.029036  | 0.001182  |
| 3                | 8                | 0              | -1.393311               | 0.312393  | -0.000605 |
| 4                | 6                | 0              | -2.773607               | -0.209620 | 0.004708  |
| 5                | 1                | 0              | -3.234543               | 0.226209  | 0.888162  |
| 6                | 1                | 0              | -3.223160               | 0.176795  | -0.907210 |
| 7                | 1                | 0              | -2.718808               | -1.294455 | 0.034680  |
| 8                | 6                | 0              | 0.885818                | 1.543921  | -0.009897 |
| 9                | 1                | 0              | 1.933290                | 1.846072  | -0.016475 |
| 10               | 1                | 0              | 0.405338                | 1.958294  | -0.897975 |
| 11               | 1                | 0              | 0.413205                | 1.969830  | 0.877056  |
| 12               | 6                | 0              | 1.454845                | -0.619958 | -1.265394 |
| 13               | 1                | 0              | 2.512499                | -0.351368 | -1.251524 |
| 14               | 1                | 0              | 1.362297                | -1.705356 | -1.248306 |
| 15               | 1                | 0              | 0.999111                | -0.221496 | -2.171949 |
| 16               | 6                | 0              | 1.477450                | -0.604677 | 1.262051  |
| 17               | 1                | 0              | 1.382689                | -1.690056 | 1.259648  |
| 18               | 1                | 0              | 2.535212                | -0.338687 | 1.227508  |
| 19               | 1                | 0              | 1.038444                | -0.195422 | 2.172059  |

---

## 27T

%chk=Methoxytbutylnitrenium-t-dft .chk

---

# opt freq=noraman 6-311g(d,p) geom=connectivity m062x

---

---

| Center<br>Number | Atomic<br>Number | Atomic<br>Type | Coordinates (Angstroms) |           |           |
|------------------|------------------|----------------|-------------------------|-----------|-----------|
|                  |                  |                | X                       | Y         | Z         |
| 1                | 7                | 0              | 0.449054                | 0.216056  | -0.688137 |
| 2                | 6                | 0              | -0.888691               | -0.050489 | 0.023035  |
| 3                | 8                | 0              | 1.494858                | 0.633796  | -0.141857 |
| 4                | 6                | 0              | 2.657791                | -0.294841 | -0.056622 |
| 5                | 1                | 0              | 2.960082                | -0.519697 | -1.076752 |
| 6                | 1                | 0              | 3.403851                | 0.283452  | 0.477041  |
| 7                | 1                | 0              | 2.333068                | -1.176163 | 0.492869  |
| 8                | 6                | 0              | -0.586249               | -1.081005 | 1.106309  |
| 9                | 1                | 0              | -1.529168               | -1.292452 | 1.616560  |
| 10               | 1                | 0              | -0.220326               | -2.017875 | 0.682994  |
| 11               | 1                | 0              | 0.117849                | -0.695539 | 1.845976  |
| 12               | 6                | 0              | -1.834109               | -0.558341 | -1.050166 |
| 13               | 1                | 0              | -2.804818               | -0.734655 | -0.583555 |
| 14               | 1                | 0              | -1.964395               | 0.178298  | -1.843186 |
| 15               | 1                | 0              | -1.484074               | -1.498331 | -1.477735 |
| 16               | 6                | 0              | -1.292974               | 1.315658  | 0.583132  |
| 17               | 1                | 0              | -1.427895               | 2.048581  | -0.212106 |
| 18               | 1                | 0              | -2.252892               | 1.171670  | 1.086241  |
| 19               | 1                | 0              | -0.568137               | 1.684058  | 1.309335  |

---

## 27S-ts

%chk=MethoxytbutylnitreniumTS-s-dft .chk

---

# opt=(calcfc,qst2) freq=noraman 6-311g(d,p) geom=connectivity m062x

---



---

| Center<br>Number | Atomic<br>Number | Atomic<br>Type | Coordinates (Angstroms) |           |           |
|------------------|------------------|----------------|-------------------------|-----------|-----------|
|                  |                  |                | X                       | Y         | Z         |
| 1                | 7                | 0              | -0.353764               | 0.341148  | 0.403938  |
| 2                | 6                | 0              | 0.879001                | -0.129527 | 0.121350  |
| 3                | 8                | 0              | -1.313665               | -0.493595 | 0.072083  |
| 4                | 6                | 0              | -2.625576               | 0.086046  | 0.282946  |
| 5                | 1                | 0              | -2.819911               | 0.828574  | -0.491413 |
| 6                | 1                | 0              | -3.312573               | -0.750026 | 0.194410  |
| 7                | 1                | 0              | -2.665495               | 0.529460  | 1.275523  |

|    |   |   |           |           |           |
|----|---|---|-----------|-----------|-----------|
| 8  | 6 | 0 | 1.071845  | -1.500226 | -0.449650 |
| 9  | 1 | 0 | 2.090511  | -1.613228 | -0.818136 |
| 10 | 1 | 0 | 0.913578  | -2.218819 | 0.360718  |
| 11 | 1 | 0 | 0.351210  | -1.724790 | -1.234307 |
| 12 | 6 | 0 | 2.003148  | 0.526144  | 0.873071  |
| 13 | 1 | 0 | 2.880293  | 0.635511  | 0.234302  |
| 14 | 1 | 0 | 1.706558  | 1.489284  | 1.285694  |
| 15 | 1 | 0 | 2.267655  | -0.140011 | 1.698748  |
| 16 | 6 | 0 | 0.390100  | 1.126716  | -1.122989 |
| 17 | 1 | 0 | 0.507852  | 2.136325  | -0.750059 |
| 18 | 1 | 0 | 1.265180  | 0.786854  | -1.686682 |
| 19 | 1 | 0 | -0.510305 | 0.946675  | -1.701390 |

## 28S

%chk=formylnitrenium-s-CBSAPNO.chk

# cbs-apno geom=connectivity

| Center<br>Number | Atomic<br>Number | Atomic<br>Type | Coordinates (Angstroms) |           |           |
|------------------|------------------|----------------|-------------------------|-----------|-----------|
|                  |                  |                | X                       | Y         | Z         |
| 1                | 7                | 0              | -0.919958               | -0.108549 | -0.142081 |
| 2                | 1                | 0              | -1.338840               | -0.428368 | 0.748605  |
| 3                | 6                | 0              | 0.217572                | 0.610204  | 0.026492  |
| 4                | 8                | 0              | 0.736118                | -0.513707 | 0.001551  |
| 5                | 1                | 0              | 0.584169                | 1.636640  | 0.074605  |

## 28T

%chk=formylnitrenium-t-CBSAPNO.chk

# cbs-apno geom=connectivity

| Center<br>Number | Atomic<br>Number | Atomic<br>Type | Coordinates (Angstroms) |           |           |
|------------------|------------------|----------------|-------------------------|-----------|-----------|
|                  |                  |                | X                       | Y         | Z         |
| 1                | 7                | 0              | -1.137591               | -0.201955 | -0.121642 |
| 2                | 1                | 0              | -1.828306               | -0.191652 | 0.641985  |
| 3                | 6                | 0              | 0.073607                | 0.359687  | 0.007773  |

|   |   |   |          |           |           |
|---|---|---|----------|-----------|-----------|
| 4 | 8 | 0 | 1.150631 | -0.253190 | 0.022131  |
| 5 | 1 | 0 | 0.144750 | 1.472740  | -0.014175 |

---

### 29S

%chk=acetylnitrenium-s-dft.chk

---

# opt freq=noraman 6-311g(d,p) geom=connectivity m062x

---

---

| Center Number | Atomic Number | Atomic Type | Coordinates (Angstroms) |           |           |
|---------------|---------------|-------------|-------------------------|-----------|-----------|
|               |               |             | X                       | Y         | Z         |
| 1             | 6             | 0           | 0.090780                | -0.007807 | 0.004905  |
| 2             | 8             | 0           | -0.813820               | 0.846759  | 0.013606  |
| 3             | 6             | 0           | 1.532151                | -0.072958 | 0.019164  |
| 4             | 1             | 0           | 1.956555                | 0.895144  | 0.282914  |
| 5             | 1             | 0           | 1.861479                | -0.878239 | 0.681617  |
| 6             | 1             | 0           | 1.827115                | -0.351911 | -1.004997 |
| 7             | 7             | 0           | -1.059372               | -0.704537 | -0.138946 |
| 8             | 1             | 0           | -1.456570               | -1.022721 | 0.759826  |

---

### 29T

%chk=acetylnitrenium-t-dft.chk

---

# opt freq=noraman 6-311g(d,p) geom=connectivity m062x

---

---

| Center Number | Atomic Number | Atomic Type | Coordinates (Angstroms) |           |           |
|---------------|---------------|-------------|-------------------------|-----------|-----------|
|               |               |             | X                       | Y         | Z         |
| 1             | 6             | 0           | -0.128714               | 0.073360  | 0.011534  |
| 2             | 8             | 0           | -0.368459               | 1.277400  | 0.001596  |
| 3             | 6             | 0           | 1.339156                | -0.350859 | 0.017497  |
| 4             | 1             | 0           | 1.975024                | 0.514239  | 0.197230  |
| 5             | 1             | 0           | 1.455328                | -1.111169 | 0.793602  |
| 6             | 1             | 0           | 1.512012                | -0.780479 | -0.974456 |
| 7             | 7             | 0           | -1.078391               | -0.870361 | -0.123645 |
| 8             | 1             | 0           | -1.708610               | -1.084273 | 0.662193  |

---



**30S-iso (does not converge on nitrenium ion)**

%chk=AcetylMethylnitrenium-s-dft .chk

-----  
# opt freq=noraman 6-311g(d,p) geom=connectivity m062x  
-----

| Center<br>Number | Atomic<br>Number | Atomic<br>Type | Coordinates (Angstroms) |           |           |
|------------------|------------------|----------------|-------------------------|-----------|-----------|
|                  |                  |                | X                       | Y         | Z         |
| 1                | 7                | 0              | -1.029009               | -0.328225 | -0.184834 |
| 2                | 6                | 0              | -2.150744               | -0.668308 | -0.267696 |
| 3                | 1                | 0              | -3.177215               | -0.971012 | -0.353868 |
| 4                | 1                | 0              | -3.437456               | 2.203845  | 1.013386  |
| 5                | 1                | 0              | -3.282127               | 1.717540  | 1.463418  |
| 6                | 6                | 0              | 1.153127                | 0.333508  | -0.023677 |
| 7                | 8                | 0              | 1.089528                | 1.411418  | -0.290482 |
| 8                | 6                | 0              | 1.565636                | -1.002657 | 0.333895  |
| 9                | 1                | 0              | 1.060029                | -1.269786 | 1.263102  |
| 10               | 1                | 0              | 1.262548                | -1.671244 | -0.473936 |
| 11               | 1                | 0              | 2.652956                | -0.978371 | 0.450461  |

**30T**

%chk=AcetylMethylnitrenium-t-dft .chk

-----  
# opt freq 6-311g(d,p) geom=connectivity um062x  
-----

| Center<br>Number | Atomic<br>Number | Atomic<br>Type | Coordinates (Angstroms) |           |           |
|------------------|------------------|----------------|-------------------------|-----------|-----------|
|                  |                  |                | X                       | Y         | Z         |
| 1                | 7                | 0              | -0.694976               | -0.612331 | -0.000046 |
| 2                | 6                | 0              | -2.035363               | -0.204405 | -0.000018 |
| 3                | 1                | 0              | -2.662961               | -1.103284 | -0.000100 |
| 4                | 1                | 0              | -2.241624               | 0.399870  | 0.897787  |
| 5                | 1                | 0              | -2.241616               | 0.400033  | -0.897715 |
| 6                | 6                | 0              | 0.628690                | 0.207662  | -0.000018 |
| 7                | 8                | 0              | 0.373035                | 1.348802  | 0.000089  |
| 8                | 6                | 0              | 1.846622                | -0.620623 | -0.000017 |
| 9                | 1                | 0              | 1.832684                | -1.261296 | 0.886080  |
| 10               | 1                | 0              | 1.832720                | -1.261276 | -0.886130 |
| 11               | 1                | 0              | 2.721656                | 0.026043  | 0.000011  |

**31S**

%chk=FormylVinylNitrenium-s-dft .chk

-----  
# opt freq=noraman 6-311g(d,p) geom=connectivity rm062x  
-----

-----

| Center<br>Number | Atomic<br>Number | Atomic<br>Type | Coordinates (Angstroms) |           |           |
|------------------|------------------|----------------|-------------------------|-----------|-----------|
|                  |                  |                | X                       | Y         | Z         |
| 1                | 7                | 0              | 0.063699                | 0.623086  | 0.103771  |
| 2                | 6                | 0              | 0.851545                | -0.369970 | -0.157096 |
| 3                | 6                | 0              | 2.207643                | -0.043805 | 0.080497  |
| 4                | 1                | 0              | 0.533116                | -1.313224 | -0.601234 |
| 5                | 1                | 0              | 3.027442                | -0.642526 | -0.314773 |
| 6                | 1                | 0              | 2.426910                | 0.868670  | 0.632212  |
| 7                | 6                | 0              | -1.356351               | 0.423170  | -0.180222 |
| 8                | 8                | 0              | -1.850809               | -0.575668 | 0.220481  |
| 9                | 1                | 0              | -1.843916               | 1.274459  | -0.665523 |

-----

**31T**

%chk=FormylVinylNitrenium-t-dft .chk

-----  
# opt freq=noraman 6-311g(d,p) geom=connectivity um062x  
-----

-----

| Center<br>Number | Atomic<br>Number | Atomic<br>Type | Coordinates (Angstroms) |           |           |
|------------------|------------------|----------------|-------------------------|-----------|-----------|
|                  |                  |                | X                       | Y         | Z         |
| 1                | 7                | 0              | 0.012293                | -0.092277 | -0.000006 |
| 2                | 6                | 0              | 1.197008                | 0.427659  | 0.000012  |
| 3                | 6                | 0              | 2.355536                | -0.358072 | 0.000010  |
| 4                | 1                | 0              | 1.256595                | 1.522911  | -0.000018 |
| 5                | 1                | 0              | 3.323524                | 0.124998  | -0.000041 |
| 6                | 1                | 0              | 2.287986                | -1.438785 | -0.000030 |
| 7                | 6                | 0              | -1.409710               | 0.326797  | -0.000004 |
| 8                | 8                | 0              | -2.299037               | -0.421707 | 0.000002  |
| 9                | 1                | 0              | -1.418862               | 1.432168  | -0.000006 |

-----

**32S**

%chk=Acetylmethoxynitrenium-s-dft .chk

-----  
# opt=calcfc freq=noraman 6-311g(d,p) geom=connectivity m062x  
-----

| Center<br>Number | Atomic<br>Number | Atomic<br>Type | Coordinates (Angstroms) |           |           |
|------------------|------------------|----------------|-------------------------|-----------|-----------|
|                  |                  |                | X                       | Y         | Z         |
| 1                | 7                | 0              | 0.318662                | -0.585708 | -0.058215 |
| 2                | 6                | 0              | -1.133873               | 0.212384  | -0.007451 |
| 3                | 8                | 0              | -1.061477               | 1.372965  | -0.010164 |
| 4                | 6                | 0              | -2.211203               | -0.796496 | 0.022394  |
| 5                | 1                | 0              | -2.158136               | -1.405067 | -0.884942 |
| 6                | 1                | 0              | -2.062751               | -1.462607 | 0.876795  |
| 7                | 1                | 0              | -3.172216               | -0.291527 | 0.089619  |
| 8                | 8                | 0              | 1.185531                | 0.244345  | 0.033638  |
| 9                | 6                | 0              | 2.601075                | -0.219805 | 0.006500  |
| 10               | 1                | 0              | 3.032815                | 0.304450  | -0.844377 |
| 11               | 1                | 0              | 3.014053                | 0.141547  | 0.946537  |
| 12               | 1                | 0              | 2.587178                | -1.301826 | -0.092572 |

-----  
**32T**

%chk=Acetylmethoxynitrenium-t-dft .chk

-----  
# opt freq 6-311g(d,p) scrf=(smd,solvent=water) geom=connectivity um06  
2x  
-----

| Center<br>Number | Atomic<br>Number | Atomic<br>Type | Coordinates (Angstroms) |           |           |
|------------------|------------------|----------------|-------------------------|-----------|-----------|
|                  |                  |                | X                       | Y         | Z         |
| 1                | 7                | 0              | -0.301421               | -0.894144 | -0.158823 |
| 2                | 6                | 0              | 1.153306                | 0.329804  | -0.021980 |
| 3                | 8                | 0              | 0.763894                | 1.385437  | -0.180159 |
| 4                | 6                | 0              | 2.273365                | -0.558584 | 0.244922  |
| 5                | 1                | 0              | 2.040735                | -1.137668 | 1.140227  |
| 6                | 1                | 0              | 2.373371                | -1.231037 | -0.609737 |
| 7                | 1                | 0              | 3.157396                | 0.064803  | 0.378046  |
| 8                | 8                | 0              | -1.369526               | -0.387343 | -0.557764 |
| 9                | 6                | 0              | -2.288916               | 0.177622  | 0.463725  |
| 10               | 1                | 0              | -1.748477               | 0.972080  | 0.974556  |
| 11               | 1                | 0              | -3.125958               | 0.548303  | -0.116455 |

12 1 0 -2.568589 -0.635276 1.128509

---

**33S-iso (does not converge on nitrenium)**

%chk=betalactnitrenium-s-dft.chk

---

# opt freq=noraman 6-311g(d,p) geom=connectivity rm062x

---

---

| Center<br>Number | Atomic<br>Number | Atomic<br>Type | Coordinates (Angstroms) |           |           |
|------------------|------------------|----------------|-------------------------|-----------|-----------|
|                  |                  |                | X                       | Y         | Z         |
| 1                | 6                | 0              | 1.376306                | -0.086623 | 0.000094  |
| 2                | 6                | 0              | 0.461566                | 1.107496  | 0.000005  |
| 3                | 1                | 0              | 2.454058                | -0.217205 | -0.000168 |
| 4                | 1                | 0              | 0.567599                | -2.023808 | -0.000126 |
| 5                | 1                | 0              | 0.499815                | 1.730694  | 0.896362  |
| 6                | 1                | 0              | 0.500274                | 1.729824  | -0.896913 |
| 7                | 7                | 0              | 0.478493                | -1.004486 | 0.000022  |
| 8                | 6                | 0              | -0.660489               | 0.058078  | 0.000070  |
| 9                | 8                | 0              | -1.804437               | -0.082726 | -0.000041 |

---

**33T-iso2 (does not converge on nitrenium ion)**

%chk=betalactnitrenium-t-dft.chk

---

# opt freq=noraman 6-311g(d,p) geom=connectivity m062x

---

---

| Center<br>Number | Atomic<br>Number | Atomic<br>Type | Coordinates (Angstroms) |           |           |
|------------------|------------------|----------------|-------------------------|-----------|-----------|
|                  |                  |                | X                       | Y         | Z         |
| 1                | 6                | 0              | 1.366745                | 0.189544  | 0.325448  |
| 2                | 6                | 0              | 0.109174                | 0.946326  | -0.218739 |
| 3                | 1                | 0              | 1.329918                | 0.123494  | 1.419814  |
| 4                | 1                | 0              | 2.242421                | 0.784201  | 0.037221  |
| 5                | 1                | 0              | -0.076420               | 1.903855  | 0.283962  |
| 6                | 1                | 0              | 0.180175                | 1.108353  | -1.302570 |
| 7                | 7                | 0              | 1.391941                | -1.108890 | -0.263364 |
| 8                | 6                | 0              | -1.072215               | 0.140663  | -0.029392 |
| 9                | 8                | 0              | -1.980238               | -0.477109 | 0.117652  |

---

### 34S-iso (does not converge on nitrenium)

%chk=gamlactnitrenium-s-dft.chk

-----  
# opt freq=noraman 6-311g(d,p) geom=connectivity m062x  
-----

| Center<br>Number | Atomic<br>Number | Atomic<br>Type | Coordinates (Angstroms) |           |           |
|------------------|------------------|----------------|-------------------------|-----------|-----------|
|                  |                  |                | X                       | Y         | Z         |
| 1                | 6                | 0              | -1.216941               | -0.868085 | -0.000187 |
| 2                | 6                | 0              | -0.082938               | 1.236008  | -0.000173 |
| 3                | 6                | 0              | -1.475456               | 0.595660  | 0.000062  |
| 4                | 1                | 0              | -1.977133               | -1.644834 | -0.001859 |
| 5                | 1                | 0              | 0.434188                | -2.086318 | -0.000448 |
| 6                | 1                | 0              | 0.108465                | 1.852019  | 0.880060  |
| 7                | 1                | 0              | 0.108350                | 1.852398  | -0.880102 |
| 8                | 1                | 0              | -2.082204               | 0.848151  | 0.875834  |
| 9                | 1                | 0              | -2.083863               | 0.849008  | -0.874191 |
| 10               | 6                | 0              | 0.899428                | 0.089279  | 0.000045  |
| 11               | 8                | 0              | 2.065939                | 0.006555  | -0.000173 |
| 12               | 7                | 0              | 0.031447                | -1.148577 | 0.000516  |

### 34T-iso2 (does not converge on nitrenium)

%chk=gamlactnitrenium-t-dft.chk

-----  
# opt freq=noraman 6-311g(d,p) geom=connectivity m062x  
-----

| Center<br>Number | Atomic<br>Number | Atomic<br>Type | Coordinates (Angstroms) |           |           |
|------------------|------------------|----------------|-------------------------|-----------|-----------|
|                  |                  |                | X                       | Y         | Z         |
| 1                | 6                | 0              | -1.685174               | -0.443906 | -0.084840 |
| 2                | 6                | 0              | 0.309647                | 1.110518  | -0.341550 |
| 3                | 6                | 0              | -1.028397               | 0.863252  | 0.402078  |
| 4                | 1                | 0              | -2.102653               | -0.324610 | -1.095779 |
| 5                | 1                | 0              | -2.503758               | -0.732788 | 0.587032  |
| 6                | 1                | 0              | 0.779838                | 2.060762  | -0.057475 |
| 7                | 1                | 0              | 0.188404                | 1.090126  | -1.432845 |
| 8                | 1                | 0              | -0.846420               | 0.825417  | 1.476405  |
| 9                | 1                | 0              | -1.663479               | 1.724386  | 0.194164  |

|    |   |   |           |           |           |
|----|---|---|-----------|-----------|-----------|
| 10 | 6 | 0 | 1.312722  | 0.105628  | -0.049861 |
| 11 | 8 | 0 | 2.176992  | -0.550985 | 0.185229  |
| 12 | 7 | 0 | -0.674380 | -1.435480 | -0.101186 |

---

### 35S-iso (does not converge on nitrenium)

%chk=succinimidyl-s-dft.chk

---

# opt=tight freq=noraman 6-311g(d,p) nosymm geom=connectivity m062x in  
t=ultrafine

---

| Center<br>Number | Atomic<br>Number | Atomic<br>Type | Coordinates (Angstroms) |           |           |
|------------------|------------------|----------------|-------------------------|-----------|-----------|
|                  |                  |                | X                       | Y         | Z         |
| 1                | 6                | 0              | -0.000880               | 0.667916  | -1.872030 |
| 2                | 6                | 0              | -0.000326               | -0.664193 | -1.873924 |
| 3                | 1                | 0              | -0.926621               | 1.233630  | -1.917612 |
| 4                | 1                | 0              | 0.924335                | 1.234400  | -1.918702 |
| 5                | 1                | 0              | -0.925597               | -1.230543 | -1.921124 |
| 6                | 1                | 0              | 0.925362                | -1.229767 | -1.922216 |
| 7                | 6                | 0              | 0.000248                | 1.157205  | 1.044981  |
| 8                | 8                | 0              | -0.000384               | 2.246957  | 0.778433  |
| 9                | 7                | 0              | 0.001008                | -0.002987 | 1.513264  |
| 10               | 6                | 0              | 0.001264                | -1.161822 | 1.041636  |
| 11               | 8                | 0              | 0.001592                | -2.250796 | 0.771925  |

---

### 35T

%chk=succinimidyl-t-dft.chk

---

# opt=(calcfc,tight) freq=noraman 6-311g(d,p) nosymm geom=connectivity  
m062x int=ultrafine

---

| Center<br>Number | Atomic<br>Number | Atomic<br>Type | Coordinates (Angstroms) |           |           |
|------------------|------------------|----------------|-------------------------|-----------|-----------|
|                  |                  |                | X                       | Y         | Z         |
| 1                | 6                | 0              | -0.000665               | 0.771153  | -1.228671 |
| 2                | 6                | 0              | 0.000002                | -0.769245 | -1.230909 |
| 3                | 1                | 0              | -0.890675               | 1.210642  | -1.681391 |
| 4                | 1                | 0              | 0.888650                | 1.211379  | -1.682050 |

|    |   |   |           |           |           |
|----|---|---|-----------|-----------|-----------|
| 5  | 1 | 0 | -0.889734 | -1.208167 | -1.684715 |
| 6  | 1 | 0 | 0.889580  | -1.207396 | -1.685759 |
| 7  | 6 | 0 | -0.000146 | 1.054681  | 0.280410  |
| 8  | 8 | 0 | -0.000653 | 2.242461  | 0.639739  |
| 9  | 7 | 0 | 0.000832  | -0.002410 | 1.087463  |
| 10 | 6 | 0 | 0.000985  | -1.057141 | 0.277325  |
| 11 | 8 | 0 | 0.001824  | -2.245956 | 0.633189  |

---

### 36S

%chk=allylnitrenium-s-dft.chk

---

# opt freq=noraman 6-311g(d,p) geom=connectivity m062x

---

| Center<br>Number | Atomic<br>Number | Atomic<br>Type | Coordinates (Angstroms) |           |           |
|------------------|------------------|----------------|-------------------------|-----------|-----------|
|                  |                  |                | X                       | Y         | Z         |
| 1                | 6                | 0              | 1.422591                | 0.201683  | 0.187286  |
| 2                | 6                | 0              | 0.379098                | -0.425562 | -0.406361 |
| 3                | 1                | 0              | 2.390032                | 0.253203  | -0.303623 |
| 4                | 1                | 0              | 1.338916                | 0.628761  | 1.182813  |
| 5                | 1                | 0              | 0.418121                | -0.871837 | -1.391311 |
| 6                | 6                | 0              | -0.958004               | 0.655600  | -0.169800 |
| 7                | 1                | 0              | -1.276274               | 0.791065  | -1.200536 |
| 8                | 1                | 0              | -0.900747               | 1.533893  | 0.471253  |
| 9                | 7                | 0              | -0.894261               | -0.608832 | 0.320438  |
| 10               | 1                | 0              | -0.772328               | -0.663584 | 1.331592  |

---

### 36T

%chk=allylnitrenium-t-dft.chk

---

# opt freq=noraman 6-311g(d,p) geom=connectivity m062x

---

| Center<br>Number | Atomic<br>Number | Atomic<br>Type | Coordinates (Angstroms) |           |           |
|------------------|------------------|----------------|-------------------------|-----------|-----------|
|                  |                  |                | X                       | Y         | Z         |
| 1                | 6                | 0              | 1.581962                | -0.271426 | 0.198082  |
| 2                | 6                | 0              | 0.563337                | 0.373169  | -0.410438 |

|    |   |   |           |           |           |
|----|---|---|-----------|-----------|-----------|
| 3  | 1 | 0 | 2.548054  | -0.359700 | -0.287200 |
| 4  | 1 | 0 | 1.485743  | -0.684034 | 1.198251  |
| 5  | 1 | 0 | 0.633381  | 0.716150  | -1.437454 |
| 6  | 6 | 0 | -0.749670 | 0.581865  | 0.283967  |
| 7  | 1 | 0 | -1.333173 | 1.438991  | -0.066247 |
| 8  | 1 | 0 | -0.695109 | 0.613326  | 1.379669  |
| 9  | 7 | 0 | -1.422126 | -0.624672 | -0.090223 |
| 10 | 1 | 0 | -1.057794 | -1.453677 | -0.585121 |

---

### 37S-iso (does not converge on nitrenium)

%chk=homoallylnitrenium-s-dft.chk

---

# opt freq=noraman 6-311g(d,p) geom=connectivity m062x

---

| Center<br>Number | Atomic<br>Number | Atomic<br>Type | Coordinates (Angstroms) |           |           |
|------------------|------------------|----------------|-------------------------|-----------|-----------|
|                  |                  |                | X                       | Y         | Z         |
| 1                | 6                | 0              | 0.002137                | -0.967542 | -0.002512 |
| 2                | 6                | 0              | -1.048839               | -0.022293 | 0.483047  |
| 3                | 1                | 0              | 0.135612                | -1.815949 | 0.672748  |
| 4                | 1                | 0              | -0.216013               | -1.351388 | -1.001929 |
| 5                | 1                | 0              | -1.004882               | 0.259587  | 1.531736  |
| 6                | 6                | 0              | -2.034264               | 0.409502  | -0.294789 |
| 7                | 1                | 0              | -2.809787               | 1.058035  | 0.093994  |
| 8                | 1                | 0              | -2.113767               | 0.114437  | -1.336471 |
| 9                | 6                | 0              | 1.591240                | 0.923162  | -0.029299 |
| 10               | 1                | 0              | 2.613967                | 1.273896  | -0.118697 |
| 11               | 1                | 0              | 0.765567                | 1.614922  | 0.109893  |
| 12               | 7                | 0              | 1.347708                | -0.321789 | -0.094009 |
| 13               | 1                | 0              | 2.133704                | -0.957986 | -0.231896 |

---

### 37T

%chk=homoallylnitrenium-t-dft.chk

---

# opt freq=noraman 6-311g(d,p) geom=connectivity m062x

---

| Center<br>Number | Atomic<br>Number | Atomic<br>Type | Coordinates (Angstroms) |   |   |
|------------------|------------------|----------------|-------------------------|---|---|
|                  |                  |                | X                       | Y | Z |



---

|    |   |   |           |           |           |
|----|---|---|-----------|-----------|-----------|
| 1  | 6 | 0 | 1.639231  | 0.838311  | -0.054970 |
| 2  | 6 | 0 | 1.205390  | -0.452900 | 0.232055  |
| 3  | 1 | 0 | 2.644184  | 1.161675  | 0.197817  |
| 4  | 1 | 0 | 0.949178  | 1.542235  | -0.519345 |
| 5  | 1 | 0 | 1.741424  | -1.020161 | 0.992103  |
| 6  | 6 | 0 | 0.030477  | -1.038279 | -0.391779 |
| 7  | 1 | 0 | -0.034796 | -2.111813 | -0.230663 |
| 8  | 1 | 0 | -0.052805 | -0.789526 | -1.451471 |
| 9  | 6 | 0 | -1.258746 | -0.335579 | 0.273583  |
| 10 | 1 | 0 | -2.097686 | -0.931911 | -0.115850 |
| 11 | 1 | 0 | -1.237954 | -0.462943 | 1.363067  |
| 12 | 7 | 0 | -1.341556 | 1.016026  | -0.114758 |
| 13 | 1 | 0 | -2.218762 | 1.430941  | 0.214318  |

---

**38S-iso (does not converge on nitrenium)**

%chk=pentenynitrenium-s-dft.chk

---

# opt freq=noraman 6-311g(d,p) geom=connectivity m062x

---



---

| Center<br>Number | Atomic<br>Number | Atomic<br>Type | Coordinates (Angstroms) |           |           |
|------------------|------------------|----------------|-------------------------|-----------|-----------|
|                  |                  |                | X                       | Y         | Z         |
| 1                | 6                | 0              | -1.432780               | -0.695820 | -0.280155 |
| 2                | 1                | 0              | -2.278181               | -1.233924 | 0.144369  |
| 3                | 1                | 0              | -1.526956               | -0.717892 | -1.368266 |
| 4                | 6                | 0              | -1.388519               | 0.741450  | 0.221038  |
| 5                | 1                | 0              | -2.072604               | 1.435281  | -0.262696 |
| 6                | 1                | 0              | -1.505416               | 0.795634  | 1.303462  |
| 7                | 7                | 0              | 0.040430                | 1.151525  | -0.081366 |
| 8                | 1                | 0              | 0.377450                | 1.882582  | 0.549237  |
| 9                | 6                | 0              | -0.077246               | -1.258988 | 0.166352  |
| 10               | 1                | 0              | 0.250703                | -2.111620 | -0.426231 |
| 11               | 1                | 0              | -0.118645               | -1.571660 | 1.213873  |
| 12               | 6                | 0              | 0.874530                | -0.101140 | 0.022388  |
| 13               | 6                | 0              | 2.188723                | -0.025768 | -0.035239 |
| 14               | 1                | 0              | 0.103381                | 1.520986  | -1.034732 |
| 15               | 1                | 0              | 2.720324                | 0.913240  | -0.139177 |
| 16               | 1                | 0              | 2.778691                | -0.931708 | 0.023415  |

-----  
**38T-iso2 (does not converge on nitrenium)**

%chk=pentenylnitrenium-t-dft.chk

-----  
# opt freq=noraman 6-311g(d,p) geom=connectivity m062x  
-----

-----

| Center<br>Number | Atomic<br>Number | Atomic<br>Type | Coordinates (Angstroms) |           |           |
|------------------|------------------|----------------|-------------------------|-----------|-----------|
|                  |                  |                | X                       | Y         | Z         |
| 1                | 6                | 0              | -1.495170               | -0.677093 | -0.129188 |
| 2                | 1                | 0              | -2.252032               | -1.169194 | 0.477574  |
| 3                | 1                | 0              | -1.771095               | -0.788650 | -1.179723 |
| 4                | 6                | 0              | -1.371824               | 0.810980  | 0.218011  |
| 5                | 1                | 0              | -2.030134               | 1.503526  | -0.315450 |
| 6                | 1                | 0              | -1.513906               | 0.999324  | 1.296538  |
| 7                | 7                | 0              | 0.008139                | 1.109733  | -0.069060 |
| 8                | 1                | 0              | 0.394820                | 2.055192  | -0.051850 |
| 9                | 6                | 0              | -0.080177               | -1.209706 | 0.123426  |
| 10               | 1                | 0              | 0.133227                | -2.134176 | -0.409241 |
| 11               | 1                | 0              | 0.093823                | -1.375974 | 1.190036  |
| 12               | 6                | 0              | 0.831116                | -0.070349 | -0.359956 |
| 13               | 6                | 0              | 2.212476                | 0.010891  | 0.181000  |
| 14               | 1                | 0              | 0.869548                | -0.077275 | -1.469485 |
| 15               | 1                | 0              | 2.987494                | 0.544473  | -0.350169 |
| 16               | 1                | 0              | 2.452759                | -0.513721 | 1.095436  |

-----

**39S-iso (does not converge on nitrenium)**

%chk=fluoromethylnitrenium-s-dft.chk

-----  
# opt freq=noraman 6-311g(d,p) nosymm geom=connectivity m062x  
-----

-----

| Center<br>Number | Atomic<br>Number | Atomic<br>Type | Coordinates (Angstroms) |          |           |
|------------------|------------------|----------------|-------------------------|----------|-----------|
|                  |                  |                | X                       | Y        | Z         |
| 1                | 7                | 0              | 0.231119                | 0.959227 | -0.379027 |
| 2                | 1                | 0              | -0.432231               | 1.651550 | -0.027727 |

-----

|   |   |   |          |           |           |
|---|---|---|----------|-----------|-----------|
| 3 | 6 | 0 | 1.147274 | 0.488271  | 0.372597  |
| 4 | 1 | 0 | 1.872165 | -0.249085 | 0.035151  |
| 5 | 1 | 0 | 0.143608 | 0.653427  | -1.346272 |
| 6 | 9 | 0 | 1.237902 | 0.884020  | 1.575425  |

---

### 39T

%chk=fluoromethylnitrenium-t-dft .chk

---

# opt freq=noraman 6-311g(d,p) nosymm geom=connectivity m062x

---

| Center<br>Number | Atomic<br>Number | Atomic<br>Type | Coordinates (Angstroms) |           |           |
|------------------|------------------|----------------|-------------------------|-----------|-----------|
|                  |                  |                | X                       | Y         | Z         |
| 1                | 7                | 0              | -0.288427               | 0.718761  | -0.088634 |
| 2                | 1                | 0              | -1.098622               | 1.330792  | 0.112256  |
| 3                | 6                | 0              | 1.147123                | 0.575573  | -0.008710 |
| 4                | 1                | 0              | 1.370332                | -0.499069 | 0.025396  |
| 5                | 1                | 0              | 1.560236                | 1.047796  | -0.915200 |
| 6                | 9                | 0              | 1.509194                | 1.213558  | 1.105040  |

---

### 40S-iso (does not converge on nitrenium)

%chk=trifluoromethylnitrenium-s-dft .chk

---

# opt freq=noraman 6-311g(d,p) geom=connectivity rm062x

---

| Center<br>Number | Atomic<br>Number | Atomic<br>Type | Coordinates (Angstroms) |           |           |
|------------------|------------------|----------------|-------------------------|-----------|-----------|
|                  |                  |                | X                       | Y         | Z         |
| 1                | 7                | 0              | -0.651912               | -0.639298 | 0.000007  |
| 2                | 1                | 0              | -0.763547               | -1.657622 | -0.000214 |
| 3                | 6                | 0              | 0.464787                | 0.000566  | -0.000049 |
| 4                | 9                | 0              | -1.772726               | 0.064495  | 0.000027  |
| 5                | 9                | 0              | 1.549755                | -0.633614 | 0.000036  |
| 6                | 9                | 0              | 0.504995                | 1.250154  | -0.000012 |

---

### 40T

%chk=trifluoromethylnitrenium-t-dft .chk

---

```
# opt=(calcall,tight) freq=noraman 6-311g(d,p) geom=connectivity m062x
int=ultrafine
```

---

---

| Center<br>Number | Atomic<br>Number | Atomic<br>Type | Coordinates (Angstroms) |           |           |
|------------------|------------------|----------------|-------------------------|-----------|-----------|
|                  |                  |                | X                       | Y         | Z         |
| 1                | 7                | 0              | 1.393434                | 0.015257  | 0.443884  |
| 2                | 1                | 0              | 2.401303                | -0.014764 | 0.186361  |
| 3                | 6                | 0              | -0.120974               | -0.000265 | -0.014812 |
| 4                | 9                | 0              | -0.334504               | -1.219296 | -0.361433 |
| 5                | 9                | 0              | -0.791948               | 0.380841  | 1.005658  |
| 6                | 9                | 0              | -0.143493               | 0.828406  | -1.000300 |

---

#### 41S-iso (does not converge on nitrogenium)

```
%chk=phosphonyl-s-dft.chk
```

```
# opt=calcfrc freq=noraman 6-311g(d,p) geom=connectivity m062x
```

---

---

| Center<br>Number | Atomic<br>Number | Atomic<br>Type | Coordinates (Angstroms) |           |           |
|------------------|------------------|----------------|-------------------------|-----------|-----------|
|                  |                  |                | X                       | Y         | Z         |
| 1                | 7                | 0              | -1.331897               | -0.285224 | -0.000004 |
| 2                | 1                | 0              | -2.163080               | 0.304408  | -0.000045 |
| 3                | 15               | 0              | 0.132922                | 0.312933  | 0.000003  |
| 4                | 8                | 0              | 1.366488                | -0.427588 | -0.000006 |
| 5                | 1                | 0              | 0.063786                | 1.709880  | 0.000022  |
| 6                | 1                | 0              | -1.503159               | -1.291009 | 0.000050  |

---

#### 41T

```
%chk=phosphonyl-t-dft.chk
```

```
# opt=calcfrc freq 6-311g(d,p) geom=connectivity um062x
```

---

---

| Center<br>Number | Atomic<br>Number | Atomic<br>Type | Coordinates (Angstroms) |           |           |
|------------------|------------------|----------------|-------------------------|-----------|-----------|
|                  |                  |                | X                       | Y         | Z         |
| 1                | 7                | 0              | -1.387323               | -0.280880 | -0.000223 |

|   |    |   |           |           |           |
|---|----|---|-----------|-----------|-----------|
| 2 | 1  | 0 | -1.504385 | -1.310357 | 0.000715  |
| 3 | 15 | 0 | 0.182735  | 0.469399  | 0.000057  |
| 4 | 8  | 0 | 1.017536  | -0.787353 | -0.000017 |
| 5 | 1  | 0 | 0.166681  | 1.267100  | 1.152575  |
| 6 | 1  | 0 | 0.167657  | 1.267250  | -1.152445 |

---

**42S-iso (does not converge on nitrogen)**

%chk=silyl-s-dft.chk

---

# opt freq 6-311g(d,p) geom=connectivity rm062x

---

| Center<br>Number | Atomic<br>Number | Atomic<br>Type | Coordinates (Angstroms) |           |           |
|------------------|------------------|----------------|-------------------------|-----------|-----------|
|                  |                  |                | X                       | Y         | Z         |
| 1                | 7                | 0              | -1.057910               | -0.000046 | -0.000169 |
| 2                | 1                | 0              | -1.624489               | -0.843174 | 0.001238  |
| 3                | 14               | 0              | 0.581315                | -0.000014 | 0.000074  |
| 4                | 1                | 0              | 1.258139                | -1.292326 | -0.000859 |
| 5                | 1                | 0              | 1.257288                | 1.292779  | 0.000297  |
| 6                | 1                | 0              | -1.623986               | 0.843246  | -0.000533 |

---

**42T**

%chk=silyl-t-dft.chk

---

# opt=calcfc freq=noraman 6-311g(d,p) geom=connectivity um062x

---

| Center<br>Number | Atomic<br>Number | Atomic<br>Type | Coordinates (Angstroms) |           |           |
|------------------|------------------|----------------|-------------------------|-----------|-----------|
|                  |                  |                | X                       | Y         | Z         |
| 1                | 7                | 0              | -1.255168               | 0.000142  | -0.000453 |
| 2                | 1                | 0              | -2.284532               | -0.000477 | 0.001438  |
| 3                | 14               | 0              | 0.607566                | -0.000020 | 0.000090  |
| 4                | 1                | 0              | 0.854770                | 1.301883  | 0.634081  |
| 5                | 1                | 0              | 0.854249                | -1.200292 | 0.810240  |
| 6                | 1                | 0              | 0.855773                | -0.101830 | -1.443846 |

---

**43S**

%chk=sulfonyl-s-dft.chk

---

# opt freq 6-311g(d,p) geom=connectivity rm062x

---



---

| Center<br>Number | Atomic<br>Number | Atomic<br>Type | Coordinates (Angstroms) |           |           |
|------------------|------------------|----------------|-------------------------|-----------|-----------|
|                  |                  |                | X                       | Y         | Z         |
| 1                | 7                | 0              | 1.087795                | 0.717400  | -0.264364 |
| 2                | 1                | 0              | 1.762678                | 0.990905  | 0.469599  |
| 3                | 16               | 0              | -0.281035               | 0.000986  | 0.271034  |
| 4                | 8                | 0              | -1.531951               | 0.079836  | -0.367859 |
| 5                | 8                | 0              | 0.962558                | -0.814855 | -0.204613 |
| 6                | 1                | 0              | -0.325538               | -0.148332 | 1.624181  |

---

**43T**

%chk=sulfonyl-t-dft.chk

---

# opt=(calcall,tight) freq=noraman 6-311g(d,p) geom=connectivity int=u  
ltrafine um062x

---



---



---

| Center<br>Number | Atomic<br>Number | Atomic<br>Type | Coordinates (Angstroms) |           |           |
|------------------|------------------|----------------|-------------------------|-----------|-----------|
|                  |                  |                | X                       | Y         | Z         |
| 1                | 7                | 0              | 1.439645                | 0.485408  | -0.162641 |
| 2                | 1                | 0              | 1.580065                | 1.464485  | -0.471532 |
| 3                | 16               | 0              | -0.098032               | 0.072408  | 0.237920  |
| 4                | 8                | 0              | -1.273859               | 0.681031  | -0.273135 |
| 5                | 8                | 0              | 0.013123                | -1.443686 | -0.201484 |
| 6                | 1                | 0              | -0.003174               | 0.080369  | 1.600248  |

---
